1 **High-resolution mapping of DNA alkylation damage and base excision**  
2 **repair at yeast transcription factor binding sites**

3  
4 Mingrui Duan<sup>1</sup>, Smitha Sivapragasam<sup>2</sup>, Jacob S. Antony<sup>2</sup>, Jenna Ulibarri<sup>1</sup>, John M.  
5 Hinz<sup>2</sup>, Gregory M.K. Poon<sup>3</sup>, John J. Wyrick<sup>2,4,\*</sup>, Peng Mao<sup>1,\*</sup>

6  
7 <sup>1</sup>Department of Internal Medicine, University of New Mexico Comprehensive Cancer  
8 Center, University of New Mexico, Albuquerque, NM 87131, USA

9 <sup>2</sup>School of Molecular Biosciences and <sup>4</sup>Center for Reproductive Biology, Washington  
10 State University, Pullman, WA 99164, USA

11 <sup>3</sup>Departments of Chemistry, Georgia State University, Atlanta, GA 30303, USA

12  
13 \*Corresponding authors: John J. Wyrick ([jwyrick@wsu.edu](mailto:jwyrick@wsu.edu)) and Peng Mao  
14 ([PMao@salud.unm.edu](mailto:PMao@salud.unm.edu))

15  
16  
17 Keywords: BER, NER, MMS, chromatin, mutagenesis

18

## 19 **Abstract**

20 DNA base damage arises frequently in living cells and needs to be removed by base  
21 excision repair (BER) to prevent mutagenesis and genome instability. Both the  
22 formation and repair of base damage occur in chromatin and are conceivably affected  
23 by DNA-binding proteins such as transcription factors (TFs). However, to what extent  
24 TF binding affects base damage distribution and BER in cells is unclear. Here, we used  
25 a genome-wide damage mapping method, *N*-methylpurine-sequencing (NMP-seq), to  
26 characterize alkylation damage distribution and BER at TF binding sites in yeast cells  
27 treated with the alkylating agent methyl methanesulfonate (MMS). Our data shows that  
28 alkylation damage formation was mainly suppressed at the binding sites of yeast TFs  
29 Abf1 and Reb1, but individual hotspots with elevated damage levels were also found.  
30 Additionally, Abf1 and Reb1 binding strongly inhibits BER *in vivo* and *in vitro*, causing  
31 slow repair both within the core motif and its adjacent DNA. The observed effects are  
32 caused by the TF-DNA interaction, because damage formation and BER can be  
33 restored by depletion of Abf1 or Reb1 protein from the nucleus. Thus, our data reveal  
34 that TF binding significantly modulates alkylation base damage formation and inhibits  
35 repair by the BER pathway. The interplay between base damage formation and BER  
36 may play an important role in affecting mutation frequency in gene regulatory regions.

37

## 38 **Introduction**

39 DNA in living cells is exposed to an array of genotoxic agents, both endogenous and  
40 exogenous. Alkylating agents comprise a large number of reactive chemicals present in  
41 cells and in the environment (Fu et al., 2012), which can react with the nitrogen and  
42 oxygen atoms of DNA bases to induce formation of alkylation damage. Some alkylation

43 damage is cytotoxic and mutagenic (Kondo et al., 2010), and thus poses threats to cell  
44 growth and genome stability. On the other hand, the cytotoxicity of DNA alkylation is  
45 utilized in chemotherapy. Alkylating agents such as temozolomide (TMZ) are used for  
46 the treatment of glioblastoma and other cancers (Fu et al., 2012; Newlands et al., 1997).  
47 Therefore, studies of alkylation damage and its repair are relevant for both cancer  
48 prevention and therapy.

49 The most common alkylation lesions are *N*-methylpurines (NMPs), including 7-  
50 methylguanine (7meG) and, to a lesser extent, 3-methyladenine (3meA) (Kondo et al.,  
51 2010). Although 7meG is not genotoxic by itself, it is prone to spontaneous depurination  
52 to form a mutagenic apurinic (AP) site (Fu et al., 2012). 7meG can also form deleterious  
53 DNA-protein crosslinks with the lysine-rich histone tails (Yang et al., 2018). The 3meA  
54 damage is even more harmful than 7meG, as 3meA lesions block DNA polymerases  
55 and affect DNA replication (Plosky et al., 2008). Hence, NMP lesions need to be  
56 repaired in a timely manner to avoid detrimental outcomes such as cell death or  
57 mutations. The primary repair pathway for NMPs is base excision repair (BER), which is  
58 initiated by alkyladenine-DNA glycosylase (AAG; also known as MPG and ANPG) in  
59 human cells or its yeast ortholog Mag1 (Wyatt et al., 1999). During BER, AAG/Mag1  
60 removes the alkylated base and generates an AP site, which is then cleaved by the  
61 apurinic/apyrimidinic endonuclease (APE1) (Whitaker and Freudenthal, 2018).  
62 Subsequently, DNA polymerase and ligase are recruited to the nick to conduct repair  
63 synthesis and ligation, respectively (Krokan and Bjørås, 2013).

64 Transcription factors (TFs) are key proteins that regulate gene expression. Many  
65 TFs bind to DNA in a sequence-specific manner to direct transcription initiation to target

66 promoters (Jolma et al., 2013). While TFs mainly function in transcriptional regulation,  
67 their binding to DNA can affect DNA damage formation and repair (Mao and Wyrick,  
68 2019). To this end, several TF proteins have been shown to modulate formation of  
69 ultraviolet (UV) light-induced photolesions (Frigola et al., 2021; Hu et al., 2017; Mao et  
70 al., 2018) and inhibit nucleotide excision repair (NER) (Conconi et al., 1999;  
71 Sabarinathan et al., 2016). The altered UV damage formation and suppressed NER are  
72 believed to cause increased mutation rates at TF binding sites in skin cancers (Frigola  
73 et al., 2021; Mao et al., 2018; Sabarinathan et al., 2016). Previous studies have also  
74 found that mutation rates are significantly increased at TF binding sites in non-UV  
75 exposed tumors (Kaiser et al., 2016; Melton et al., 2015), such as gastric and prostate  
76 cancers (Guo et al., 2018; Morova et al., 2020). However, what causes the high  
77 mutation rates in non-UV exposed cancers remains elusive. Since base damage (e.g.,  
78 oxidative, alkylation, uracil, and so on) caused by endogenous and exogenous  
79 damaging sources is prevalently associated with cancer mutations (Tubbs and  
80 Nussenzweig, 2017; Wallace et al., 2012), a potential mechanism for mutation elevation  
81 in non-UV exposed tumors is increased base damage formation and/or suppressed  
82 BER in TF-bound DNA. However, this hypothesis has not been tested and it is unclear  
83 to what extent TF binding affects base damage formation and BER.

84 Alkylation damage has been widely used as a model lesion for BER studies (Fu et  
85 al., 2012; Li et al., 2015). We previously developed an alkylation damage mapping  
86 method, *N*-methylpurine-sequencing (NMP-seq), to precisely map 7meG and 3meA  
87 lesions in cells treated with methyl methanesulfonate (MMS) (Mao et al., 2017). Here,  
88 we used NMP-seq to analyze alkylation damage formation and BER at the binding sites

89 of ARS binding factor 1 (Abf1) and rDNA enhancer binding protein 1 (Reb1), two  
90 essential yeast TFs that have been extensively characterized. The genome-wide  
91 binding sites for Abf1 and Reb1 have been identified at near base-pair resolution  
92 (Kasinathan et al., 2014; Rossi et al., 2021) and the DNA-binding mechanisms were  
93 analyzed in previous studies (Jaiswal et al., 2016; McBroom and Sadowski, 1994a).  
94 Analysis of our NMP-seq data indicates that both damage formation and BER are  
95 affected by TF binding in yeast cells. We further show that Reb1 protein binding directly  
96 inhibits BER of alkylation damage *in vitro*. Collectively, these analyses uncover an  
97 important role for TF binding in modulating base damage formation and inhibiting BER.  
98

## 99 **Results**

### 100 **Abf1 and Reb1 modulate alkylation damage formation at their binding sites**

101 NMP-seq is a sequencing method developed to map 7meG and 3meA lesions across  
102 the genome (Mao et al., 2017). This method employs BER enzymes AAG and APE1 to  
103 digest MMS-damaged DNA and create a nick at the NMP lesion site, which is then  
104 ligated to adaptor DNA for next-generation sequencing (Supplemental Fig. S1A). As  
105 NMP lesion sites are precisely tagged by the adaptor DNA, sequencing with a primer  
106 complementary to the adaptor generates a genome-wide profile of NMP lesions at  
107 single-nucleotide resolution (Mao et al., 2017).

108 To determine how TF binding affects NMP lesion formation, we analyzed initial NMP  
109 lesions at Abf1 and Reb1 binding sites in yeast immediately after 10 min MMS  
110 treatment (i.e., no repair incubation). The ongoing BER during the period of MMS  
111 exposure may repair some of the damage and affect analysis of NMP formation. To

112 minimize the effect of endogenous BER, we used a BER-deficient *mag1* deletion strain  
113 (i.e., *mag1Δ*) to profile the initial NMP distribution. We obtained a total of ~44 million  
114 sequencing reads in MMS-treated *mag1Δ* cells. The majority of the reads (~56%) were  
115 associated with G nucleotides (G reads), followed by A nucleotides (A reads)  
116 (Supplemental Fig. S1B), consistent with the expected trend of 7meG and 3meA lesion  
117 formation after MMS treatment (Friedberg et al., 2006).

118 Since 7meG is the major class of lesion induced by MMS, we first characterized  
119 7meG formation at Abf1 and Reb1 binding sites. To account for potential DNA  
120 sequence bias at the binding sites, we also mapped NMP damage in naked yeast  
121 genomic DNA, in which all proteins were removed and the purified DNA was damaged  
122 by incubating with MMS (Supplemental Fig. S1C and S1D). Normalization of cellular G  
123 reads by the naked DNA G reads enables us to elucidate the modulation of 7meG  
124 formation by TF proteins. Importantly, we found that formation of 7meG was significantly  
125 inhibited at Abf1 and Reb1 binding sites relative to the flanking DNA (Fig. 1A and 1B,  
126 Supplemental Fig. S2A). Analysis of the average 7meG levels in 5 bp non-overlapping  
127 moving windows indicates that 7meG was reduced by up to 40% and 70% for Abf1 and  
128 Reb1 binding sites, respectively. Furthermore, the extent of damage reduction was  
129 correlated with the level of TF occupancy, as Reb1 binding sites with low occupancy  
130 (occupancy <10) (Kasinathan et al., 2014) only slightly reduced 7meG formation (Fig.  
131 1C).

132 Damage formation was further analyzed in the TF core motif and its immediately  
133 adjacent DNA (20 bp on each side of the motif midpoint). This analysis shows that  
134 7meG formation was strongly suppressed in the conserved regions of the motif

135 sequences (Fig. 1D, 1E and Supplemental Fig. S2B) where Abf1 and Reb1 proteins  
136 directly contact DNA (Jaiswal et al., 2016; McBroom and Sadowski, 1994a). In contrast,  
137 7meG damage levels were not affected outside of the core motif (e.g., -20 to -10 and 10  
138 to 20 bp relative to the motif midpoint). 7meG levels were relatively even across the  
139 'low-occupancy' Reb1 binding sites (Fig. 1F and Supplemental Fig. S2B), even though  
140 these sites have nearly identical motif sequence as the 'high-occupancy' binding sites.  
141 While damage formation was mainly suppressed in the core motif, we also saw  
142 increased 7meG levels (~1.5 fold) at a few positions (e.g., -7, -3, -2, and 0) at the edge  
143 of the Abf1 motif or between the two highly conserved regions within the motif (Fig. 1D).  
144 Moreover, analysis of A reads indicates that 3meA formation was increased at the -3  
145 position of the 'high-occupancy' Reb1 sites, but not at the same position of the 'low-  
146 occupancy' Reb1 sites (Supplemental Fig. S3A and S3B). Intriguingly, the increased  
147 3meA formation appears to be position dependent, because the adjacent -2 and -1  
148 positions (both are conserved in A or T) did not show elevated 3meA damage formation.  
149 To understand why the -3 position is sensitive to MMS treatment, we analyzed the  
150 published Reb1-DNA complex structure (Jaiswal et al., 2016). Analysis of the structural  
151 data indicates that Reb1 protein binding causes a large curvature (~56°) in DNA and  
152 significantly compresses the minor groove near the -3 position (Supplemental Fig. S3C  
153 and S3D). These structural changes caused by Reb1 protein binding may play a role in  
154 modulating 3meA formation.

### 155 **Abf1 and Reb1 binding inhibits repair of 7meG lesions**

156 To address how TF binding affects 7meG repair in cells, we analyzed NMP-seq data  
157 generated after repair incubation (e.g., 1 and 2 h repair). Repair analysis was conducted

158 by normalizing 7meG lesions at each time point to the initial 7meG damage (i.e., 0 h  
159 repair). This analysis considers the variable amounts of initial damage along the motif  
160 sequence, which can conceivably impact remaining damage after repair. The  
161 normalization (i.e., damage after repair / initial damage) results in fraction of remaining  
162 damage, which is inversely correlated with DNA repair activity (Mao et al., 2017, 2016).

163 Our analysis indicates that repair of 7meG lesions was strongly suppressed at both  
164 Abf1 and Reb1 binding sites in wild-type (WT) cells, shown by peaks of unrepaired  
165 damage at 1 h (Supplemental Fig. S4A) and 2 h (Fig. 2A and 2B) near the TF binding  
166 midpoint. The repair suppression is mediated by TF binding, not the underlying DNA  
167 sequence, because no repair inhibition was observed at 'low-occupancy' Reb1 binding  
168 sites (Fig. 2C). Additionally, nucleosomes around the TF binding sites play an important  
169 role in affecting 7meG repair. Fast repair was observed in the nucleosome-depleted  
170 region around the TF binding site and linker DNA between two adjacent nucleosomes  
171 (Fig. 2A and 2B). In contrast, slow repair was found near nucleosome peaks, which is  
172 consistent with previous studies showing inhibition of BER at the nucleosome dyad  
173 center (Kennedy et al., 2019; Mao et al., 2017). A closer examination of remaining  
174 damage indicates that repair was suppressed in an ~30-40 bp DNA region including the  
175 conserved core motif and its immediately adjacent DNA (Fig. 2D and 2E). Hence, TF  
176 binding inhibits BER in a broader DNA region (both core motif and adjacent DNA)  
177 relative to its impact on NMP damage formation (mainly in the core motif).

178 Repair of 7meG by BER is initiated by the Mag1 glycosylase in yeast (Wyatt et al.,  
179 1999). To test if the inhibited repair of 7meG at TF binding sites is due to reduced BER,  
180 we analyzed 7meG repair in the *mag1Δ* mutant strain. NMP-seq analysis in this mutant



181 revealed higher levels of unrepaired 7meG lesions at 2 h than in WT (Fig. 2F),  
182 consistent with deficient BER for NMPs in the mutant. Moreover, there was no  
183 difference in remaining damage between the TF binding sites and flanking DNA in  
184 *mag1Δ* cells (Fig. 2F), confirming that BER is inhibited by TF binding.

185 The above analyses were performed using TF binding data generated with occupied  
186 regions of genomes from affinity-purified naturally isolated chromatin (ORGANIC), a  
187 method utilizing micrococcal nuclease (MNase) to digest native chromatin (i.e., not  
188 formaldehyde cross linked) and immunoprecipitate the TF-DNA complex for sequencing  
189 (Kasinathan et al., 2014). To confirm our findings, we used TF binding data generated  
190 with the ChIP-exonuclease (ChIP-exo) method (Rossi et al., 2021). ChIP-exo is similar  
191 to the conventional ChIP-seq, but utilizes exonuclease to cleave free DNA after  
192 chromatin immunoprecipitation to improve mapping resolution (Rhee and Pugh, 2012).  
193 Analysis of NMP-seq data at Abf1 and Reb1 ChIP-exo peaks and flanking regions  
194 showed strongly inhibited BER after 2 h repair (Supplemental Fig. S4B, left and middle  
195 panels), consistent with our analyses using ORGANIC binding data. Moreover, ChIP-  
196 exo was used to map binding sites for other yeast TFs such as Repressor Activator  
197 Protein (Rap1) (Rossi et al., 2021), an essential yeast TF involved in both activation and  
198 suppression of RNA Pol II transcription (Shore and Nasmyth, 1987). We analyzed  
199 7meG repair at Rap1 ChIP-exo sites and found that BER was also strongly inhibited by  
200 Rap1 binding (Supplemental Fig. S4B, right panel). Hence, NMP-seq analysis using  
201 both ORGANIC and ChIP-exo binding data consistently indicates an inhibitory role of TF  
202 binding in BER.

203 **Depletion of Abf1 or Reb1 protein restores 7meG formation and elevates BER at**  
204 **their binding sites**

205 Our data suggests that TF binding acts as a barrier to the damaging chemical MMS and  
206 BER enzymes. We hypothesize that removal of the TF would expose the binding sites  
207 to MMS and repair enzymes. As both Abf1 and Reb1 are essential for yeast survival  
208 and cannot be knocked out, we used the published Anchor-Away strategy (Haruki et al.,  
209 2008) to conditionally and rapidly export the protein from the nucleus to the cytoplasm.  
210 We then performed NMP-seq experiments in the TF-depleted yeast strains to analyze  
211 7meG formation and repair. Both Abf1 and Reb1 anchor-away strains (Abf1-AA and  
212 Reb1-AA) were generated and used to study their impacts on gene transcription (Kubik  
213 et al., 2018, 2015). We followed the published protocol to deplete Abf1 or Reb1 from the  
214 nucleus with rapamycin. Moreover, growth of Abf1-AA or Reb1-AA strain was inhibited  
215 on rapamycin-containing plates (Supplemental Fig. S5A), confirming that nuclear  
216 depletion of either protein is lethal for yeast cells (Kubik et al., 2015).

217 In the control strain (WT-AA), in which no target protein is tagged for depletion,  
218 analysis of the NMP-seq data indicates that 7meG damage formation was still  
219 suppressed at the conserved motif sequences upon rapamycin treatment  
220 (Supplemental Fig. S5B), indicating that rapamycin itself had little effect on NMP  
221 damage formation. However, TF depletion in Abf1-AA or Reb1-AA cells restored  
222 damage formation at their corresponding binding sites (Supplemental Fig. S5C and  
223 S5D). For example, Abf1 depletion increased 7meG formation at Abf1 binding sites to a  
224 level comparable to the flanking DNA; however, no damage restoration was seen at  
225 Reb1 binding sites in Abf1-AA cells (Supplemental Fig. S5C). Similarly, damage was

226 restored at Reb1 binding sites in Reb1-AA cells, but not at Abf1 sites (Supplemental  
227 Fig. S5D). Therefore, these data indicate that nuclear depletion of each TF specifically  
228 affects damage formation at its own binding sites, but has no effect on the binding sites  
229 of the other TF.

230 Analysis of 7meG repair in the anchor-away strains indicates that BER was restored  
231 and even elevated by removing each TF from the binding sites. Compared to the control  
232 WT-AA strain (Fig. 3A and 3B), no repair inhibition was seen at Abf1 binding sites when  
233 Abf1 was depleted (Fig. 3C). Instead, BER was faster at Abf1 binding sites relative to  
234 the flanking DNA in Abf1-AA cells (Fig. 3C), likely because these binding sites are  
235 located in nucleosome-depleted regions and damage is efficiently repaired by BER  
236 (Mao et al., 2017). Repair in the surrounding nucleosomes was also affected by Abf1  
237 depletion (compare Fig. 3A and 3C), likely due to the weakened nucleosome  
238 organization around Abf1 binding sites in Abf1-AA cells (Kubik et al., 2018). Repair of  
239 7meG damage was still inhibited at Reb1 binding sites in Abf1-AA cells (Fig. 3D),  
240 consistent with the notion that Reb1 protein still binds to its target sites in Abf1-AA cells.  
241 Similar results were also observed in Reb1-AA cells, where BER was inhibited at Abf1  
242 binding sites (Fig 3E) but accelerated at Reb1 binding sites relative to the flanking DNA  
243 (Fig. 3F). Taken together, these data demonstrate that removal of Abf1 and Reb1  
244 exposes their target sites to the damaging chemical and BER enzymes.

#### 245 **Abf1 and Reb1 inhibit BER in promoters of target genes**

246 Abf1 and Reb1 bind to the nucleosome-depleted region (NDR) of gene promoters to  
247 facilitate transcription (Kubik et al., 2018). We next sought to understand how the two  
248 TFs affect BER in the context of gene transcription. We first examined the global BER

249 pattern by analyzing 7meG repair in WT cells for all yeast genes. Genes (n=5,205) were  
250 aligned by their transcription start site (TSS) (Park et al., 2014) and repair was analyzed  
251 in accordance with the transcriptional direction. As shown in Fig. 4A, BER (average of  
252 all genes) was generally faster in NDR relative to the coding region where DNA is  
253 organized into +1, +2, and so on nucleosomes (Fig. 4A), a pattern consistent with our  
254 previous studies (Mao et al., 2017). Hence, the global BER pattern revealed by our  
255 analysis indicates that Abf1 and Reb1 do not inhibit repair in NDR when all genes were  
256 included.

257 As Abf1 or Reb1 do not affect BER globally, we hypothesized that they may  
258 specifically affect BER in target genes. To test this hypothesis, we linked Abf1 and Reb1  
259 binding sites to the closest TSS of annotated genes (Park et al., 2014). This association  
260 identified 697 Abf1-linked and 708 Reb1-linked genes (see Methods for detail). We then  
261 aligned Abf1-linked and Reb1-linked genes at their TSS and plotted 7meG repair in  
262 accordance with the transcriptional direction. For each subset of genes (i.e., Abf1-linked  
263 or Reb1-linked genes), we found a prominent damage peak in NDR after 2 h repair in  
264 WT cells (Fig 4B and 4C, black arrows). The damage peak was located ~100 bp  
265 upstream of the TSS and overlapped with Abf1 or Reb1 binding peak (Supplemental  
266 Fig. S6A and S6B), suggesting that Abf1 and Reb1 indeed inhibit BER in their target  
267 promoters. This finding was further confirmed by analyzing NMP-seq data generated in  
268 the anchor-away cells. We found that depletion of Abf1 in Abf1-AA cells did not change  
269 the global BER pattern when all genes were included (Fig. 4D), but it restored repair in  
270 the NDR of Abf1 target genes (Fig. 4E). As expected, repair in Reb1 target genes was  
271 still inhibited in the Abf1-AA cells (Fig. 4F, black arrow). Similar results were found in the

272 Reb1-AA cells (Fig. 4G to 4I). The damage peaks in NDR were not as high as repair  
273 analysis at the mapped TF binding sites (e.g., compare Fig. 4B with Fig. 2A), likely  
274 because the gene analysis was performed in each subset of genes aligned on their  
275 TSS, not the midpoint of the TF binding sites. In summary, these data indicate that Abf1  
276 and Reb1 inhibit BER in their target promoters.

### 277 **Repair of 3meA is inhibited by TF binding in vivo and in vitro**

278 Although 3meA is much less abundant than 7meG in MMS-treated cells, 3meA has long  
279 been known to be cytotoxic (Fu et al., 2012; Plosky et al., 2008). Conventional methods  
280 studying cellular repair of MMS-induced damage (e.g., AAG/APE1 digestion followed by  
281 gel electrophoresis) (Czaja et al., 2014) cannot distinguish repair of 7meG and 3meA.  
282 Additionally, 3meA is unstable and difficult to be synthesized *in vitro*. As NMP-seq maps  
283 both 3meA and 7meG lesions, we extracted A reads to specifically analyze 3meA  
284 repair.

285 Analysis of 3meA lesions in WT cells indicates that the repair was inhibited near the  
286 center of Abf1 and ‘high-occupancy’ Reb1 binding sites, as shown by high levels of  
287 remaining 3meA lesions at 2 h (Fig. 5A and 5B). In contrast, 3meA repair was not  
288 inhibited at ‘low-occupancy’ Reb1 binding sites (Fig. 5C). Interestingly, the 3meA peaks  
289 appear to be narrower than the 7meG peaks, and no clear 3meA repair inhibition was  
290 seen in nucleosomes surrounding the TF binding sites. These differences are consistent  
291 with the greater activity of Mag1 and its homologs in removing 3meA than 7meG  
292 (Connor et al., 2005), which may lead to less repair inhibition to 3meA lesions by DNA-  
293 binding proteins.

294 A closer examination of 3meA repair at ‘high-occupancy’ Reb1 binding sites  
295 revealed a slow repair spot at the +4 position (Supplemental Fig. S7A). Repair of 7meG  
296 was also inhibited at the same location (Supplemental Fig. S7B), suggesting that the +4  
297 position is refractory to BER enzymes. Although the sequence at +4 position is not  
298 conserved in the Reb1 motif, the Reb1-DNA crystal structure (Jaiswal et al., 2016)  
299 shows that this position is directly contacted by the DNA binding domain of Reb1 protein  
300 (Supplemental Fig. S3C). The strong repair inhibition at the +4 position led us to further  
301 investigate BER using an *in vitro* system. To simulate 3meA repair at the Reb1 binding  
302 site, we incorporated a stable 3meA analog, inosine (denoted as I), at the +4 position of  
303 the motif strand (Fig. 5D). Inosine can naturally arise from adenine deamination in cells  
304 and is repaired by Mag1-mediated BER (Alseth et al., 2014). We found that inosine  
305 incorporation did not change Reb1 binding affinity compared to DNA without inosine  
306 (Supplemental Fig. S7C). AAG and APE1 enzymes were added to naked DNA or DNA  
307 pre-bound with purified Reb1 protein to examine BER activity *in vitro*. The AAG/APE1  
308 cleavage product (i.e., the lower band) was analyzed in a time-course experiment to  
309 compare BER activity between free DNA and Reb1-bound DNA (Fig 5E). Quantification  
310 of the gel showed significantly reduced repair activity at the binding site in Reb1-bound  
311 DNA relative to the naked DNA substrate (Fig 5F). Reduced BER activity was also  
312 observed when inosine was placed on the other strand at the +4 position (Supplemental  
313 Fig. S7D and S7E). Hence, these *in vitro* data, consistent with our cellular damage  
314 sequencing data, indicate that BER of 3meA is suppressed by TF binding.

315 **BER inhibition at TF binding sites is different from NER inhibition**

316 TF binding has been shown to inhibit NER of UV damage (Frigola et al., 2021; Hu et al.,  
317 2017); however, it is not known if NER and BER are inhibited to the same extent. Using  
318 a UV damage mapping method cyclobutane pyrimidine dimer sequencing (CPD-seq),  
319 we previously showed that formation of UV-induced CPDs is significantly suppressed at  
320 Abf1 and Reb1 binding sites (Mao et al., 2016). To investigate NER at Abf1 and Reb1  
321 binding sites, we analyzed CPD-seq data generated in UV-irradiated yeast cells. We  
322 found that repair of CPDs at 2 h (normalized to CPDs at 0 h) was inhibited at both Abf1  
323 and Reb1 binding sites in WT cells, shown by high levels of unrepaired CPDs at the  
324 binding sites relative to the flanking nucleosome-occupied DNA (Fig. 6A and 6B). As  
325 both Abf1 and Reb1 binding sites are localized in gene promoters (Supplemental Fig.  
326 S6), transcription-coupled NER (TC-NER) may play a role in the removal of CPDs in  
327 transcribed regions surrounding the binding sites. To reduce the interference from TC-  
328 NER, we analyzed CPD-seq data generated in a *rad26* $\Delta$  mutant strain in which TC-NER  
329 is severely diminished (Duan et al., 2020), thus allowing us to focus on global genomic  
330 NER (GG-NER). Our data indicates that GG-NER was suppressed at the center of Abf1  
331 and Reb1 binding sites, but elevated in DNA adjacent to the center due to depletion of  
332 nucleosomes (Fig. 6C and 6D), similar to the BER pattern (Fig. 2A and 2B).  
333 Additionally, GG-NER was also modulated by nucleosomes positioned around the TF  
334 binding sites. These analyses indicate that GG-NER is inhibited by both Abf1 and Reb1  
335 at their binding sites.

336 As the GG-NER pattern at the TF binding sites resembles the BER pattern revealed  
337 by our NMP-seq data, we sought to understand if the size of the inhibited DNA region is  
338 the same for both repair pathways. A comparison between CPD and 7meG repair

339 indicates that GG-NER was inhibited in a broader DNA region at Abf1 and Reb1 binding  
340 (Fig. 6E and 6F). While BER (i.e., 7meG repair) was inhibited in ~30-40 bp DNA  
341 surrounding the center of the binding motif, inhibition of GG-NER was extended by an  
342 additional 10 bp on each side (Fig. 6E and 6F). These high-resolution sequencing data  
343 demonstrate the difference between BER and GG-NER at TF binding sites, which is  
344 consistent with the different mechanisms underlying NER and BER (see Discussion).

345

## 346 **Discussion**

347 In this study, we used MMS-induced damage as a model lesion and analyzed base  
348 damage distribution and BER at the binding sites of yeast TFs. Our high-resolution  
349 damage mapping data revealed an important role for TF binding in modulating initial  
350 damage formation and inhibiting BER. As base damage (e.g., oxidative, alkylation,  
351 uracil, and AP sites) has long been recognized as an important source of DNA  
352 mutations in human cancers (Maynard et al., 2009; Tubbs and Nussenzweig, 2017), the  
353 interplay between TF binding, base damage formation, and BER revealed by our study  
354 has important implications for understanding mutations in gene regulatory regions.

355 Our data shows that TF binding can significantly modulate NMP damage formation.  
356 Depending on the location and the conservation level in the binding motif, TF binding  
357 can both suppress and elevate damage levels. The highly conserved nucleotides in the  
358 core motif of both Abf1 and Reb1 binding sites mainly suppressed NMP damage  
359 formation (Fig. 1). NMP damage is formed via the chemical reaction between the  
360 alkylating agent and individual nucleotides (Fu et al., 2012). Due to protein-DNA  
361 interactions, nucleotides with restrained reactivity with MMS will be less sensitive and



362 thus generate reduced amounts of damage. The highly conserved nucleotides in the  
363 Abf1 and Reb1 motifs are directly contacted by specific amino acids of the protein  
364 (Jaiswal et al., 2016; McBroom and Sadowski, 1994a). This suggests that Abf1 and  
365 Reb1 reduce the reactivity of the bound nucleotides, thus protecting conserved parts of  
366 the core motif from alkylation DNA damage. The protective role of TFs does not seem  
367 be specific for alkylation damage. UV damage formation was also reported to be  
368 suppressed by TF binding in yeast (Mao et al., 2016) and human cells (Frigola et al.,  
369 2021). Thus, TF binding may function as important mechanism in cells that protects  
370 conserved regulatory sequences from being damaged and mutated.

371 A few specific positions in the Abf1 motif exhibit elevated 7meG formation.  
372 Moreover, we also found a specific 3meA hotspot in the Reb1 motif. While the detailed  
373 mechanism for elevated alkylation damage formation is unclear, previous studies of UV  
374 damage formation revealed that TF binding-mediated DNA structural change plays a  
375 critical role in dictating damage yields. Indeed, human ETS (E26 transformation-  
376 specific) TFs have been shown to change the DNA geometry at their binding sites and  
377 cause individual UV damage and mutation hotspots (Elliott et al., 2018; Mao et al.,  
378 2018). Yeast Abf1 protein has been shown to bend DNA toward its minor groove  
379 (McBroom and Sadowski, 1994b). DNA bending caused by Abf1 may expose certain  
380 bases in the motif and increase their reactivity with MMS, resulting in elevated damage  
381 yields. The published complex structure of Reb1 (from *Schizosaccharomyces pombe*)  
382 with DNA (Jaiswal et al., 2016) provided an opportunity to investigate how TF-DNA  
383 interactions could modulate alkylation damage distribution. The DNA-binding domain  
384 (DBD) of Reb1 winds around two turns of duplex DNA as a series of four helix-turn-helix

385 (HTH) domains, forming a so-called “saddle”-shaped structure (Supplemental Fig. S3C).  
386 Two homologous HTH domains, termed MybAD1 and MybAD2, are followed by two  
387 homologous repeat domains MybR1 and MybR2. C-terminal to the DBD is a  
388 transcription termination domain (TTD) that is not essential to DNA binding (Jaiswal et  
389 al., 2016). Within the central core of the Reb1 consensus (5'-GGGTAA-3'; the  
390 underlined G is position 0), positions +2 to 0 (i.e., GGG) are directly bound by both  
391 MybAD2 and MybR1 and exhibit significantly reduced 7meG formation (Fig. 1E).  
392 Positions -1 to -3 (i.e., TAA) are sandwiched between the subsites for MybAD1 and  
393 MybAD2, which insert recognition helices into the adjacent DNA major groove. As a  
394 result, the minor groove from positions -1 to -3 is strongly compressed in width and  
395 increased in depth (Supplemental Fig. S3D). These results suggest that preferential  
396 formation of 3meA at position -3 may be facilitated by enhanced minor groove  
397 narrowing and DNA curvature by Reb1 binding.

398 Our data further revealed strong inhibition of BER at Abf1 and Reb1 binding sites.  
399 Compared to NMP damage formation, repair of 7meG lesions was inhibited in a wider  
400 DNA region consisting of the core motif and some of the flanking DNA. As mentioned  
401 earlier, the conserved nucleotides in the core motif are bound by the TFs and BER  
402 enzymes could be sterically hindered to access these sites. Even the less conserved  
403 nucleotides in the core motif are also likely inaccessible to BER enzymes, since the TF  
404 protein covers the whole motif region. In addition to the core motif, structural data  
405 indicates that some nucleotides in the flanking DNA are bound by the Reb1 protein  
406 (Jaiswal et al., 2016). Although Abf1-DNA complex structure data is currently  
407 unavailable, it is conceivable that Abf1 also binds to part of the flanking DNA. The

408 strength of protein-DNA interaction in the flanking DNA may not be as high as in the  
409 core motif, which still allows damage formation to occur, but it considerably reduces the  
410 access of BER enzymes, particularly in DNA immediately adjacent to the core motif. As  
411 BER is generally inhibited in TF-bound DNA, damage hotspots induced by TF binding  
412 cannot be efficiently repaired and may eventually cause individual mutation hotspots  
413 when DNA is replicated. Considering the conserved damage formation and repair  
414 mechanisms between yeast and human cells, our findings provide a potential  
415 explanation to mutation hotspots at TF binding sites in non-UV exposed tumors.

416 The comparison between NMP and CPD repair at TF binding sites provides new  
417 insights into how TFs affect BER and NER differently. While TF binding inhibits both  
418 BER and NER, we found that the affected DNA region is considerably broader in NER  
419 compared to BER. NER is inhibited in about 50-60 bp DNA centered on the midpoint of  
420 Abf1 or Reb1 binding sites, whereas BER is suppressed in a narrower DNA region (Fig.  
421 6). The extended inhibition region in NER is consistent with more proteins being  
422 involved in NER compared to BER. Moreover, NER requires repair endonucleases to  
423 cleave upstream of the 5' side and downstream of the 3' side relative to the lesion,  
424 releasing a repair intermediate of ~25 nt (Huang et al., 1992; Schärer, 2013). Although  
425 UV damage located outside of the TF binding site may be recognizable by the damage  
426 recognition factor such as XPC or yeast Rad4, one of the two repair cleavage sites may  
427 still be located within the binding motif and is inaccessible to the repair endonuclease.  
428 Hence, the unique 'dual-incision' mechanism of NER is consistent with the broader  
429 repair-resistant DNA region around a TF binding site compared to BER.

430 In summary, we generated high-resolution alkylation damage and BER maps at  
431 yeast TF binding sites, which allows us to elucidate how TF binding modulates base  
432 damage formation and repair. Considering the potential connection between base  
433 damage, BER, and mutations in non-UV exposed tumors, these analyses provide  
434 important insights into cancer mutations frequently elevated at TF binding sites.

435

## 436 **Materials and Methods**

### 437 **Yeast strains**

438 Wild-type (WT) and *mag1* $\Delta$  strains were in the BY4741 background. The anchor-away  
439 (AA) strains, including WT-AA, Abf1-AA, and Reb1-AA, were gifts from Dr. David Shore  
440 (Kubik et al., 2018, 2015).

### 441 **MMS treatment**

442 Yeast cells were grown in YPD (yeast extract-peptone-dextrose) medium to mid-log  
443 phase and treated with 0.4% (v/v) MMS (Acros Organics, AC15689) for 10 min to  
444 induce alkylation damage. Cells were centrifuged and washed with sterile deionized  
445 water to remove MMS. Cells were resuspended in pre-warmed YPD medium and  
446 incubated for repair in a 30 °C shaker.

447 The anchor-away yeast cells were pre-treated with 1  $\mu$ g/ml rapamycin (Fisher  
448 Scientific, NC0678468) for 1h in YPD medium, as described in previous studies(Haruki  
449 et al., 2008; Kubik et al., 2018). At the end of rapamycin treatment, MMS was added to  
450 the culture and incubated for 10 min. After MMS treatment, cells were spun down and  
451 washed with sterile water to remove MMS. Cells were then resuspended in fresh YPD  
452 containing 1  $\mu$ g/ml rapamycin for repair time points.

453 To damage naked yeast DNA with MMS, genomic DNA was first isolated from WT  
454 yeast cells without MMS treatment. All proteins were removed during DNA isolation by  
455 using vigorous phenol chloroform extraction, followed by ethanol precipitation. The  
456 purified DNA was incubated with MMS for 10 min. After MMS treatment, DNA was  
457 purified by phenol chloroform extraction and ethanol precipitation.

#### 458 **NMP-seq library preparation**

459 NMP-seq library preparation was described in our previous study (Mao et al., 2017).  
460 Genomic DNA was sonicated to small fragments and ligated to the first adaptor DNA.  
461 The ligation product was purified and incubated with terminal transferase and dideoxy-  
462 ATP (ddATP) to block all free 3' ends (Ding et al., 2015). The NMP lesion site was  
463 cleaved by HAAG (NEB, M0313S) and APE1 (NEB, M0282S) to generate a new  
464 ligatable 3' end. DNA was denatured at 95 °C and cooled on ice, followed by ligation to  
465 the second adaptor. After purification with Streptavidin beads (Thermo Fisher, 11205D),  
466 the library DNA was briefly amplified by PCR with two primers complementary to the  
467 two adaptors. Sequencing of NMP-seq libraries was conducted on an Ion Torrent  
468 platform.

#### 469 **TF binding data sets**

470 We used published yeast TF binding data sets in this study. Most analyses were  
471 performed using the published ORGANIC binding data (Kasinathan et al., 2014).  
472 Binding sites were obtained from experiments using 10 min micrococcal nuclease  
473 digestion with 80 mM NaCl, as described in our previous study (Mao et al., 2016). Only  
474 binding sites with the canonical Abf1 or Reb1 motif sequence (CGTNNNNNRNKA and  
475 TTACCC, respectively) were used for damage and repair analysis. Binding sites that did

476 not match the motif sequences were excluded. Reb1 binding sites were further stratified  
477 into 'high-occupancy' (occupancy > 10) and 'low-occupancy' (occupancy <=10) binding  
478 sites based on the mapped occupancy levels (Kasinathan et al., 2014).

479 Some of our repair analyses (e.g., Supplemental Fig. S4B) were confirmed using  
480 ChIP-exo TF binding sites. The Abf1, Reb1, and Rap1 binding peaks were determined  
481 by mapping genome-wide binding sites in TAP-tagged yeast strains (e.g., Abf1-TAP,  
482 Reb1-TAP, and Rap1-TAP) in a recent ChIP-exo study (Rossi et al., 2021). The data  
483 were downloaded from the Gene Expression Omnibus,  
484 <https://www.ncbi.nlm.nih.gov/geo/> (accession number GSE147927).

485 To identify target genes for Abf1 and Reb1, we searched gene transcription start  
486 sites (TSS) to find the closest midpoint of Abf1 or Reb1 binding sites using the  
487 ORGANIC datasets. If the TF binding site is located within 300 bp upstream or  
488 downstream of the gene TSS, the gene is identified as a putative target gene. Some  
489 binding sites are located in the middle of two divergently transcribed genes. In this case,  
490 both genes are recognized as target genes.

#### 491 **NMP-seq data analysis**

492 Analysis of NMP-seq datasets was conducted using our published protocols (Mao et al.,  
493 2017). NMP-seq sequencing reads were demultiplexed and aligned to the yeast  
494 reference genome (sacCer3) using Bowtie 2 (Langmead and Salzberg, 2012). For each  
495 mapped read, we identified the position of its 5' end in the genome using SAMtools (Li  
496 et al., 2009) and BEDTools (Quinlan and Hall, 2010). Based on the 5' end position, the  
497 single nucleotide immediately upstream of the 5' end was found and the sequence on  
498 the opposing strand was identified as the putative NMP lesion. The number of

499 sequencing reads associated with each of the four nucleotides (e.g., A, T, C, and G)  
500 was counted to estimate the enrichment of MMS-induced NMP lesions in the  
501 sequencing libraries. G reads were typically highly enriched relative to C reads, followed  
502 by A reads.

503 To analyze damage formation and BER at TF binding sites, we extracted G or A  
504 reads to analyze 7meG and 3meA lesions, respectively. The number of lesions at each  
505 position around the midpoint of Abf1 or Reb1 binding sites was counted using the  
506 BEDTool intersect function. For damage formation, the cellular lesion counts were  
507 normalized to the naked DNA to account for the impact of DNA sequences on NMP  
508 lesion formation. The normalized ratio was scaled to 1.0 and plotted along the TF  
509 binding sites (e.g., Fig. 1A to 1C). Plots at single nucleotide resolution (e.g., Fig. 1D to  
510 1E) also show scaled damage ratio between cellular and naked DNA NMP-seq data.  
511 For repair analysis, damage counts at repair time points were normalized to the initial  
512 damage at 0 h to generate fraction of remaining damage. Positions with high fraction of  
513 remaining damage are indicative of slow repair, since a large fraction of damage is not  
514 repaired at that site. Some highly conserved positions at TF binding sites do not have  
515 lesion-forming nucleotides. These positions are labeled with asterisks in single-  
516 nucleotide resolution plots (e.g., Fig. 1D). Alternatively, we analyzed the average  
517 damage in a 5-bp non-overlapping moving window to show the average damage and  
518 repair in a broader DNA region (e.g., Fig. 1A and 2A).

519 Some NMP-seq datasets such as mag1-0 h, WT-1 h and WT-2 h, were downloaded  
520 from our published studies (NCBI GEO, accession code GSE98031). New NMP-seq  
521 data generated in this study, including NMP data in naked DNA and in anchor-away

522 yeast strains, have been submitted to NCBI GEO (accession code GSE183622). In some  
523 of the new samples (e.g., WT-AA, Abf1-AA-rep 2), we tried to add MMS-damaged  
524 pUC19 plasmid as spike-in control to quantify repair efficiency. Hence, the fraction of  
525 remaining damage in these samples was normalized by the pUC19 read ratio between  
526 0 h and 2 h.

### 527 **CPD-seq datasets and analysis**

528 Yeast CPD-seq data were downloaded from NCBI GEO (accession code GSE145911).  
529 Analysis of CPD repair at Abf1 and Reb1 binding sites was performed using the same  
530 method described in NMP-seq data analysis.

### 531 ***In vitro* Reb1 binding and BER assay**

532 Recombinant Reb1 protein was expressed in *E.coli* cells in a pET30a(+) expression  
533 vector (a gift from Dr. David Donze at Louisiana State University). Protein was purified  
534 with Co-NTA resin and eluted using 0.25 M imidazole. The purity of the eluted protein  
535 was ~90% as judged by Coomassie-stained SDS-PAGE. The nominal molecular weight  
536 of the recombinant construct was ~55 kDa. Protein concentration was determined by  
537 UV absorption at 280 nm. Reb1-DNA binding was analyzed using electrophoretic  
538 mobility shift assay (EMSA). Inosine lesion containing oligonucleotide (40  $\mu$ M), or  
539 control oligonucleotide without inosine, was labelled with  $\gamma$ -<sup>32</sup>P ATP (20  $\mu$ Ci) (Perkin  
540 Elmer) in a 25  $\mu$ L reaction containing 1X PNK buffer and 15 units of polynucleotide  
541 kinase (New England Biolabs) by incubating at 37°C for 45 minutes. The reaction was  
542 heat inactivated at 65°C for 15 minutes. G-25 sephadex<sup>TM</sup> G-50 DNA grade resin  
543 columns were used to remove unincorporated  $\gamma$ -<sup>32</sup>P ATP according to manufacturer's  
544 instructions (illustra<sup>TM</sup> GE Healthcare). The purified strand was used for subsequent



545 annealing with equal amount of complementary strand in 50  $\mu$ L total volume. The  
546 annealed duplex DNA (20 pmol) was mixed with increasing concentrations of Reb1 (5.5  
547 pmol, 11 pmol, 22 pmol, 33 pmol and 44 pmol) in 50  $\mu$ L reactions containing 1X EMSA  
548 buffer (see Fig. 5D). The binding reaction was incubated on ice for 40 minutes. Free  
549 DNA and DNA bound by Reb1 were loaded onto a 12% native PAGE and separated by  
550 gel electrophoresis at 200 V for 30 minutes. The gel was exposed to a phosphor screen  
551 and the image was scanned using a Typhoon FLA7000 scanner (GE Healthcare). Gel  
552 quantification was performed with the ImageQuant software (GE healthcare).

553 For BER assays, equal amount of naked DNA and DNA bound by Reb1 protein (~  
554 5pmol) were incubated with AAG (10 units) and APE1 (1 unit) (New England Biolabs) in  
555 a 20  $\mu$ L reaction containing 1X Thermopol buffer (20mM Tris HCl pH 8.8, 10 mM  
556  $(\text{NH}_4)_2\text{SO}_4$ , 10mM KCl, 2mM  $\text{MgSO}_4$ , 0.1% Triton X-100) at 37°C for 15, 30, 45 and 60  
557 minutes. After BER cleavage, DNA was purified using Phenol:Chloroform:Isoamyl  
558 alcohol extraction and precipitated using ethanol. The purified DNA was resuspended in  
559 formamide (80%) and denatured at 95°C for 10 minutes. The denatured DNA was  
560 analyzed by electrophoresis at 200V for 30 min using 12% polyacrylamide urea gels.  
561 The gel was exposed to a phosphor screen and imaged using a Typhoon FLA7000  
562 scanner and quantified by ImageQuant.

### 563 **Structural analysis**

564 The co-crystal structure of *Schizosaccharomyces pombe* Reb1 with terminator DNA that  
565 harbors a core consensus 5'-GGGTAA-3' (PDB: 5eyb) was used (Jaiswal et al., 2016).  
566 The bound DNA was analyzed using curves+ (Lavery et al., 2009) to fit the helical  
567 curvature and groove parameters. Values of helical parameters were reported as

568 averages  $\pm$  standard deviations for the two copies found in the asymmetric unit. Atom-  
569 centered electrostatic potentials at 25°C in implicit water were computed using APBS  
570 (Baker et al., 2001) based on atomic charges and radii assigned from the AMBER14  
571 forcefield. The solute dielectric was set to 8 based on recently reported measurements  
572 on duplex DNA (Cuervo et al., 2014).

573

## 574 **Acknowledgements**

575 We thank Mark Wildung and Wei Wei Du for technical assistance with Ion Proton  
576 sequencing. We also thank Dr. David Shore for providing anchor-away yeast strains.  
577 This work was supported by National Institute of Environmental Health Sciences Grants  
578 R21ES029302 (to P.M. and J.J.W.), R01ES028698 (to J.J.W.), NSF grant MCB  
579 2028902 (to G. M. K. P), and a pilot grant from UNM Center for Metals in Biology and  
580 Medicine (P20GM130422). This research was partially supported by UNM  
581 Comprehensive Cancer Center Support Grant NCI P30CA118100 and UNM ATG  
582 Shared Resource.

583

584

## 585 **References**

- 586 Alseth I, Dalhus B, Bjørås M. 2014. Inosine in DNA and RNA. *Current Opinion in*  
587 *Genetics & Development*, Molecular and genetic bases of disease **26**:116–123.  
588 doi:10.1016/j.gde.2014.07.008
- 589 Baker NA, Sept D, Joseph S, Holst MJ, McCammon JA. 2001. Electrostatics of  
590 nanosystems: Application to microtubules and the ribosome. *PNAS* **98**:10037–  
591 10041. doi:10.1073/pnas.181342398
- 592 Conconi A, Liu X, Koriazova L, Ackerman EJ, Smerdon MJ. 1999. Tight correlation  
593 between inhibition of DNA repair in vitro and transcription factor IIIA binding in a  
594 5S ribosomal RNA gene. *EMBO J* **18**:1387–1396. doi:10.1093/emboj/18.5.1387

- 595 Connor EE, Wilson JJ, Wyatt MD. 2005. Effects of Substrate Specificity on Initiating the  
596 Base Excision Repair of N-Methylpurines by Variant Human 3-Methyladenine  
597 DNA Glycosylases. *Chem Res Toxicol* **18**:87–94. doi:10.1021/tx049822q
- 598 Cuervo A, Dans PD, Carrascosa JL, Orozco M, Gomila G, Fumagalli L. 2014. Direct  
599 measurement of the dielectric polarization properties of DNA. *PNAS* **111**:E3624–  
600 E3630. doi:10.1073/pnas.1405702111
- 601 Czaja W, Mao P, Smerdon MJ. 2014. Chromatin remodelling complex RSC promotes  
602 base excision repair in chromatin of *Saccharomyces cerevisiae*. *DNA Repair*  
603 **16**:35–43. doi:10.1016/j.dnarep.2014.01.002
- 604 Ding J, Taylor MS, Jackson AP, Reijns MAM. 2015. Genome-wide mapping of  
605 embedded ribonucleotides and other noncanonical nucleotides using emRiboSeq  
606 and EndoSeq. *Nature Protocols* **10**:1433–1444. doi:10.1038/nprot.2015.099
- 607 Duan M, Selvam K, Wyrick JJ, Mao P. 2020. Genome-wide role of Rad26 in promoting  
608 transcription-coupled nucleotide excision repair in yeast chromatin. *Proc Natl*  
609 *Acad Sci USA* 202003868. doi:10.1073/pnas.2003868117
- 610 Elliott K, Boström M, Filges S, Lindberg M, Eynden JV den, Ståhlberg A, Clausen AR,  
611 Larsson E. 2018. Elevated pyrimidine dimer formation at distinct genomic bases  
612 underlies promoter mutation hotspots in UV-exposed cancers. *PLOS Genetics*  
613 **14**:e1007849. doi:10.1371/journal.pgen.1007849
- 614 Friedberg EC, Walker GC, Siede W, Wood RD, Schultz RA, Ellenburger T. 2006. DNA  
615 repair and mutagenesis. *DNA Repair and Mutagenesis*. ASM Press.
- 616 Frigola J, Sabarinathan R, Gonzalez-Perez A, Lopez-Bigas N. 2021. Variable interplay  
617 of UV-induced DNA damage and repair at transcription factor binding sites.  
618 *Nucleic Acids Research* **49**:891–901. doi:10.1093/nar/gkaa1219
- 619 Fu D, Calvo JA, Samson LD. 2012. Balancing repair and tolerance of DNA damage  
620 caused by alkylating agents. *Nature Reviews Cancer* **12**:104–120.  
621 doi:10.1038/nrc3185
- 622 Guo YA, Chang MM, Huang W, Ooi WF, Xing M, Tan P, Skanderup AJ. 2018. Mutation  
623 hotspots at CTCF binding sites coupled to chromosomal instability in  
624 gastrointestinal cancers. *Nature Communications* **9**:1520. doi:10.1038/s41467-  
625 018-03828-2
- 626 Haruki H, Nishikawa J, Laemmli UK. 2008. The Anchor-Away Technique: Rapid,  
627 Conditional Establishment of Yeast Mutant Phenotypes. *Molecular Cell* **31**:925–  
628 932. doi:10.1016/j.molcel.2008.07.020
- 629 Hu J, Adebali O, Adar S, Sancar A. 2017. Dynamic maps of UV damage formation and  
630 repair for the human genome. *PNAS* **114**:6758–6763.  
631 doi:10.1073/pnas.1706522114
- 632 Huang JC, Svoboda DL, Reardon JT, Sancar A. 1992. Human nucleotide excision  
633 nuclease removes thymine dimers from DNA by incising the 22nd  
634 phosphodiester bond 5' and the 6th phosphodiester bond 3' to the photodimer.  
635 *Proc Natl Acad Sci U S A* **89**:3664–3668. doi:10.1073/pnas.89.8.3664
- 636 Jaiswal R, Choudhury M, Zaman S, Singh S, Santosh V, Bastia D, Escalante CR. 2016.  
637 Functional architecture of the Reb1-Ter complex of *Schizosaccharomyces*  
638 *pombe*. *Proc Natl Acad Sci USA* **113**:E2267–E2276.  
639 doi:10.1073/pnas.1525465113

- 640 Jolma A, Yan J, Whittington T, Toivonen J, Nitta KR, Rastas P, Morgunova E, Enge M,  
641 Taipale M, Wei G, Palin K, Vaquerizas JM, Vincentelli R, Luscombe NM, Hughes  
642 TR, Lemaire P, Ukkonen E, Kivioja T, Taipale J. 2013. DNA-Binding Specificities  
643 of Human Transcription Factors. *Cell* **152**:327–339.  
644 doi:10.1016/j.cell.2012.12.009
- 645 Kaiser VB, Taylor MS, Sempé CA. 2016. Mutational Biases Drive Elevated Rates of  
646 Substitution at Regulatory Sites across Cancer Types. *PLOS Genetics*  
647 **12**:e1006207. doi:10.1371/journal.pgen.1006207
- 648 Kasinathan S, Orsi GA, Zentner GE, Ahmad K, Henikoff S. 2014. High-resolution  
649 mapping of transcription factor binding sites on native chromatin. *Nat Methods*  
650 **11**:203–209. doi:10.1038/nmeth.2766
- 651 Kennedy EE, Li C, Delaney S. 2019. Global Repair Profile of Human Alkyladenine DNA  
652 Glycosylase on Nucleosomes Reveals DNA Packaging Effects. *ACS Chem Biol*  
653 **14**:1687–1692. doi:10.1021/acscchembio.9b00263
- 654 Kondo N, Takahashi A, Ono K, Ohnishi T. 2010. DNA Damage Induced by Alkylating  
655 Agents and Repair Pathways. *Journal of Nucleic Acids* **2010**:e543531.  
656 doi:10.4061/2010/543531
- 657 Krokan HE, Bjørås M. 2013. Base Excision Repair. *Cold Spring Harb Perspect Biol*  
658 **5**:a012583. doi:10.1101/cshperspect.a012583
- 659 Kubik S, Bruzzone MJ, Jacquet P, Falcone J-L, Rougemont J, Shore D. 2015.  
660 Nucleosome Stability Distinguishes Two Different Promoter Types at All Protein-  
661 Coding Genes in Yeast. *Molecular Cell* **60**:422–434.  
662 doi:10.1016/j.molcel.2015.10.002
- 663 Kubik S, O’Duibhir E, de Jonge WJ, Mattarocci S, Albert B, Falcone J-L, Bruzzone MJ,  
664 Holstege FCP, Shore D. 2018. Sequence-Directed Action of RSC Remodeler  
665 and General Regulatory Factors Modulates +1 Nucleosome Position to Facilitate  
666 Transcription. *Molecular Cell* **71**:89–102.e5. doi:10.1016/j.molcel.2018.05.030
- 667 Langmead B, Salzberg SL. 2012. Fast gapped-read alignment with Bowtie 2. *Nat*  
668 *Methods* **9**:357–359. doi:10.1038/nmeth.1923
- 669 Lavery R, Moakher M, Maddocks JH, Petkeviciute D, Zakrzewska K. 2009.  
670 Conformational analysis of nucleic acids revisited: Curves+. *Nucleic Acids Res*  
671 **37**:5917–5929. doi:10.1093/nar/gkp608
- 672 Li H, Handsaker B, Wysoker A, Fennell T, Ruan J, Homer N, Marth G, Abecasis G,  
673 Durbin R, 1000 Genome Project Data Processing Subgroup. 2009. The  
674 Sequence Alignment/Map format and SAMtools. *Bioinformatics* **25**:2078–2079.  
675 doi:10.1093/bioinformatics/btp352
- 676 Li M, Ko T, Li S. 2015. High-resolution Digital Mapping of N-Methylpurines in Human  
677 Cells Reveals Modulation of Their Induction and Repair by Nearest-neighbor  
678 Nucleotides. *J Biol Chem* **290**:23148–23161. doi:10.1074/jbc.M115.676296
- 679 Mao P, Brown AJ, Esaki S, Lockwood S, Poon GMK, Smerdon MJ, Roberts SA, Wyrick  
680 JJ. 2018. ETS transcription factors induce a unique UV damage signature that  
681 drives recurrent mutagenesis in melanoma. *Nature Communications* **9**:2626.  
682 doi:10.1038/s41467-018-05064-0
- 683 Mao P, Brown AJ, Malc EP, Mieczkowski PA, Smerdon MJ, Roberts SA, Wyrick JJ.  
684 2017. Genome-wide maps of alkylation damage, repair, and mutagenesis in

- 685 yeast reveal mechanisms of mutational heterogeneity. *Genome Res* **27**:1674–  
686 1684. doi:10.1101/gr.225771.117
- 687 Mao P, Smerdon MJ, Roberts SA, Wyrick JJ. 2016. Chromosomal landscape of UV  
688 damage formation and repair at single-nucleotide resolution. *PNAS* **113**:9057–  
689 9062. doi:10.1073/pnas.1606667113
- 690 Mao P, Wyrick JJ. 2019. Organization of DNA damage, excision repair, and  
691 mutagenesis in chromatin: A genomic perspective. *DNA Repair, Cutting-edge*  
692 *Perspectives in Genomic Maintenance VI* **81**:102645.  
693 doi:10.1016/j.dnarep.2019.102645
- 694 Maynard S, Schurman SH, Harboe C, de Souza-Pinto NC, Bohr VA. 2009. Base  
695 excision repair of oxidative DNA damage and association with cancer and aging.  
696 *Carcinogenesis* **30**:2–10. doi:10.1093/carcin/bgn250
- 697 McBroom LD, Sadowski PD. 1994a. Contacts of the ABF1 protein of *Saccharomyces*  
698 *cerevisiae* with a DNA binding site at MATa. *J Biol Chem* **269**:16455–16460.
- 699 McBroom LD, Sadowski PD. 1994b. DNA bending by *Saccharomyces cerevisiae* ABF1  
700 and its proteolytic fragments. *Journal of Biological Chemistry* **269**:16461–16468.  
701 doi:10.1016/S0021-9258(17)34029-2
- 702 Melton C, Reuter JA, Spacek DV, Snyder M. 2015. Recurrent somatic mutations in  
703 regulatory regions of human cancer genomes. *Nature Genetics* **47**:710–716.  
704 doi:10.1038/ng.3332
- 705 Morova T, McNeill DR, Lallous N, Gönen M, Dalal K, Wilson DM, Gürsoy A, Keskin Ö,  
706 Lack NA. 2020. Androgen receptor-binding sites are highly mutated in prostate  
707 cancer. *Nature Communications* **11**:832. doi:10.1038/s41467-020-14644-y
- 708 Newlands ES, Stevens MFG, Wedge SR, Wheelhouse RT, Brock C. 1997.  
709 Temozolomide: a review of its discovery, chemical properties, pre-clinical  
710 development and clinical trials. *Cancer Treatment Reviews* **23**:35–61.  
711 doi:10.1016/S0305-7372(97)90019-0
- 712 Park D, Morris AR, Battenhouse A, Iyer VR. 2014. Simultaneous mapping of transcript  
713 ends at single-nucleotide resolution and identification of widespread promoter-  
714 associated non-coding RNA governed by TATA elements. *Nucleic Acids Res*  
715 **42**:3736–3749. doi:10.1093/nar/gkt1366
- 716 Plosky BS, Frank EG, Berry DA, Vennall GP, McDonald JP, Woodgate R. 2008.  
717 Eukaryotic Y-family polymerases bypass a 3-methyl-2'-deoxyadenosine analog in  
718 vitro and methyl methanesulfonate-induced DNA damage in vivo. *Nucleic Acids*  
719 *Res* **36**:2152–2162. doi:10.1093/nar/gkn058
- 720 Quinlan AR, Hall IM. 2010. BEDTools: a flexible suite of utilities for comparing genomic  
721 features. *Bioinformatics* **26**:841–842. doi:10.1093/bioinformatics/btq033
- 722 Rhee HS, Pugh BF. 2012. ChIP-exo: A Method to Identify Genomic Location of DNA-  
723 binding proteins at Near Single Nucleotide Accuracy. *Curr Protoc Mol Biol* **0 21**.  
724 doi:10.1002/0471142727.mb2124s100
- 725 Rossi MJ, Kuntala PK, Lai WKM, Yamada N, Badjatia N, Mittal C, Kuzu G, Bocklund K,  
726 Farrell NP, Blanda TR, Mairose JD, Basting AV, Mistretta KS, Rocco DJ,  
727 Perkinson ES, Kellogg GD, Mahony S, Pugh BF. 2021. A high-resolution protein  
728 architecture of the budding yeast genome. *Nature* **592**:309–314.  
729 doi:10.1038/s41586-021-03314-8



- 730 Sabarinathan R, Mularoni L, Deu-Pons J, Gonzalez-Perez A, López-Bigas N. 2016.  
731 Nucleotide excision repair is impaired by binding of transcription factors to DNA.  
732 *Nature* **532**:264–267. doi:10.1038/nature17661  
733 Schärer OD. 2013. Nucleotide Excision Repair in Eukaryotes. *Cold Spring Harb*  
734 *Perspect Biol* **5**. doi:10.1101/cshperspect.a012609  
735 Shore D, Nasmyth K. 1987. Purification and cloning of a DNA binding protein from yeast  
736 that binds to both silencer and activator elements. *Cell* **51**:721–732.  
737 doi:10.1016/0092-8674(87)90095-x  
738 Tubbs A, Nussenzweig A. 2017. Endogenous DNA Damage as a Source of Genomic  
739 Instability in Cancer. *Cell* **168**:644–656. doi:10.1016/j.cell.2017.01.002  
740 Wallace SS, Murphy DL, Sweasy JB. 2012. Base Excision Repair and Cancer. *Cancer*  
741 *Lett* **327**:73–89. doi:10.1016/j.canlet.2011.12.038  
742 Weiner A, Hsieh T-HS, Appleboim A, Chen HV, Rahat A, Amit I, Rando OJ, Friedman  
743 N. 2015. High-Resolution Chromatin Dynamics during a Yeast Stress Response.  
744 *Molecular Cell* **58**:371–386. doi:10.1016/j.molcel.2015.02.002  
745 Whitaker AM, Freudenthal BD. 2018. APE1: A skilled nucleic acid surgeon. *DNA Repair*  
746 *(Amst)* **71**:93–100. doi:10.1016/j.dnarep.2018.08.012  
747 Wyatt MD, Allan JM, Lau AY, Ellenberger TE, Samson LD. 1999. 3-methyladenine DNA  
748 glycosylases: structure, function, and biological importance. *BioEssays* **21**:668–  
749 676. doi:https://doi.org/10.1002/(SICI)1521-1878(199908)21:8<668::AID-  
750 BIES6>3.0.CO;2-D  
751 Yang K, Park D, Tretyakova NY, Greenberg MM. 2018. Histone tails decrease N7-  
752 methyl-2'-deoxyguanosine depurination and yield DNA–protein cross-links in  
753 nucleosome core particles and cells. *PNAS* **115**:E11212–E11220.  
754 doi:10.1073/pnas.1813338115  
755

## 756 **Figure legends**

### 757 **Figure 1. Formation of 7meG lesions at Abf1 and Reb1 binding sites. (A)**

758 Distribution of 7meG damage at 661 Abf1 binding sites and the flanking DNA in MMS-  
759 treated yeast cells. The cellular (i.e., *mag1Δ*-0 h) 7meG levels in 5 bp non-overlapping  
760 moving windows were normalized to damage in naked yeast DNA. The normalized ratio  
761 was scaled to 1.0 and plotted along the aligned Abf1 sites. **(B)** Distribution of 7meG at  
762 784 'high-occupancy' Reb1 binding sites and the flanking DNA. NMP-seq data was  
763 analyzed at Reb1 binding sites. **(C)** Distribution of 7meG at 472 'low-occupancy' Reb1  
764 binding sites. **(D) to (F)** High-resolution plots showing 7meG formation in the Abf1,  
765 'high-occupancy', and 'low-occupancy' Reb1 binding motif and the immediately adjacent

766 DNA. The top panel depicts the consensus motif sequence for each transcription factor.  
767 The lower panel shows the normalized damage levels and each column points to a  
768 specific position at the binding site. Asterisks indicate conserved motif positions with  
769 exclusive A or T nucleotides and are not 7meG-forming sequences.

770

771 **Figure 2. BER of 7meG lesions at Abf1 and Reb1 binding sites. (A)** The fraction of  
772 remaining 7meG lesions (blue line) after 2 h repair at Abf1 binding sites in wild-type  
773 (WT) cells. Remaining 7meG at the binding sites and in the flanking DNA (up to 500 bp  
774 in each direction) was shown. The binding sites were obtained from the published  
775 ORGANIC method (Kasinathan et al., 2014). The plot shows the average remaining  
776 damage in 5 bp non-overlapping moving windows. The nucleosome density, which was  
777 analyzed using the published yeast MNase-seq data (Weiner et al., 2015), was plotted  
778 as the gray background. **(B)** Repair of 7meG lesions at ‘high-occupancy’ Reb1 binding  
779 sites. **(C)** Repair of 7meG at ‘low-occupancy’ Reb1 binding sites. **(D)** and **(E)** Close-up  
780 of remaining 7meG at Abf1 and ‘high-occupancy’ Reb1 sites, respectively. 7meG  
781 fraction remaining between -70 and 70 bp relative to the TF motif midpoint was shown.  
782 **(F)** The fraction of remaining 7meG lesions after 2 h repair in the *mag1Δ* mutant at Abf1  
783 binding sites.

784

785 **Figure 3. BER of 7meG lesions in anchor-away yeast strains. (A)** Fraction of  
786 remaining 7meG lesions after 2 h repair (normalized to 0h) in rapamycin-treated WT-AA  
787 cells at Abf1 binding sites. **(B)** Remaining 7meG at ‘high-occupancy’ Reb1 binding sites  
788 in rapamycin-treated WT-AA cells. **(C)** and **(D)** Fraction of remaining 7meG at 2 h in

789 Abf1-AA cells after rapamycin treatment at Abf1 and 'high-occupancy' Reb1 sites,  
790 respectively. **(E)** and **(F)** Remaining 7meG at 2 h in Reb1-AA cells after rapamycin-  
791 mediated protein depletion at Abf1 and Reb1 sites.

792

793 **Figure 4. Repair of 7meG in the Abf1 and Reb1 target genes. (A)** Average fraction of  
794 remaining 7meG lesions (blue line) after 2 h repair in all yeast genes in WT cells. Genes  
795 (n=5,205) were aligned at the TSS (position 0) and repair was plotted in accordance  
796 with gene transcriptional direction. The average damage in 5 bp moving windows is  
797 shown from upstream 500 bp to downstream 500 bp relative to the TSS. The gray  
798 background indicates nucleosome peak density. **(B)** Average fraction of remaining  
799 7meG lesions after 2 h repair in WT cells in Abf1-linked genes (n=697). **(C)** Average  
800 fraction of remaining 7meG lesions after 2 h repair in WT cells in Reb1-linked genes  
801 (n=708). **(D)** to **(F)** Fraction of remaining 7meG at 2 h in Abf1-depleted cells for all  
802 genes, Abf1-linked, and Reb1-linked genes. **(G)** to **(I)** Fraction of remaining 7meG at 2 h  
803 in Reb1-depleted cells for all genes, Abf1-linked, and Reb1-linked genes.

804

805 **Figure 5. Repair of 3meA at TF binding sites. (A)** Average fraction of remaining  
806 3meA lesions (red line) at Abf1 binding sites mapped with the ORGANIC method. Data  
807 shows fraction of remaining 3meA lesions in 5 bp non-overlapping moving windows  
808 along the binding sites in WT cells at 2 h. **(B)** and **(C)** Fraction of remaining 3meA  
809 damage at 'high-occupancy' and 'low-occupancy' Reb1 binding sites, respectively. **(D)**  
810 The upper panel shows synthesized double-stranded DNA containing a Reb1 binding  
811 site. The inosine damage (red) was incorporated at the +4 position on the Reb1 motif



812 strand. The lower panel shows gel shift data with DNA alone or DNA incubated with  
813 increasing amounts of purified Reb1 protein. DNA was labeled with  $^{32}\text{P}$  on the 5' end of  
814 the motif strand. **(E)** Cleavage of the inosine-containing DNA or DNA complexed with  
815 Reb1 protein by AAG/APE1 enzymes. The substrates (naked DNA or DNA-Reb1  
816 complex) were incubated with AAG and APE1 enzymes to cleave the damage site. DNA  
817 was analyzed on denaturing polyacrylamide gels to separate the full-length DNA (FL  
818 DNA) and the cleavage product. **(F)** Quantification of the repair gel. Graph shows the  
819 percent of cleaved DNA (lower band) relative to total DNA (lower and upper bands) at  
820 different incubation time points.

821

822 **Figure 6. Comparison of CPD and 7meG repair at TF binding sites. (A)** Fraction of  
823 remaining CPDs at Abf1 binding sites in WT-2 h cells. Similar to NMP-seq data  
824 analysis, the number of CPD-seq reads at 2 h was normalized to initial damage reads at  
825 0 h. The resulting fraction of remaining CPDs was plotted at Abf1 binding sites and  
826 flanking DNA up to 500 bp. The average remaining damage in 5 bp non-overlapping  
827 moving windows was shown. **(B)** Fraction of remaining CPDs was analyzed at 'high-  
828 occupancy' Reb1 binding sites. **(C)** Fraction of remaining CPDs at Abf1 binding sites in  
829 the *rad26Δ* mutant strain, in which CPD repair is mainly conducted by GG-NER. **(D)**  
830 Fraction of remaining CPDs at Reb1 binding sites in the *rad26Δ* mutant cells. **(E)**  
831 Comparison between GG-NER (orange line) and BER (blue line) at Abf1 binding sites.  
832 GG-NER was analyzed using CPD-seq data (2 h relative to 0 h) generated in *rad26Δ*  
833 cells. BER analysis was conducted with NMP-seq data.

834

835  
836  
837  
838

Figure 1

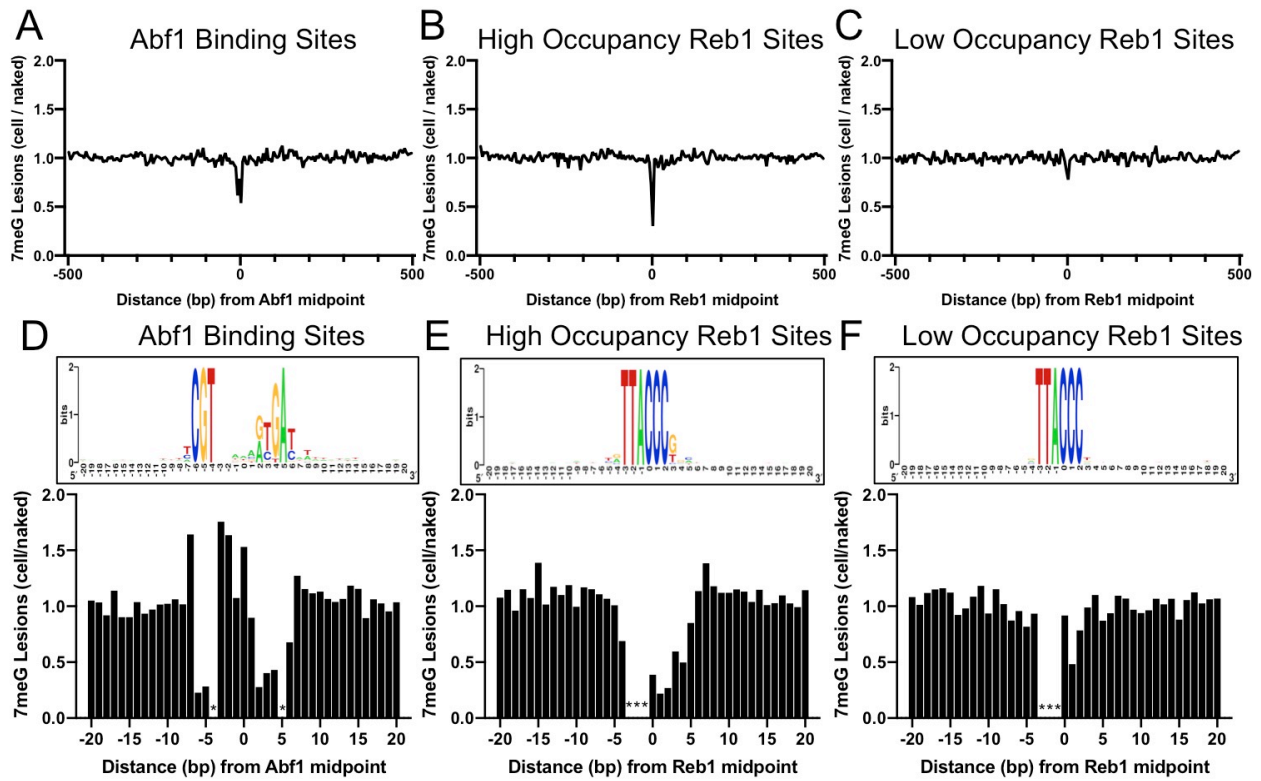

839  
840  
841  
842  
843  
844  
845  
846  
847  
848  
849  
850  
851  
852  
853  
854  
855  
856  
857  
858  
859  
860

861 Figure 2

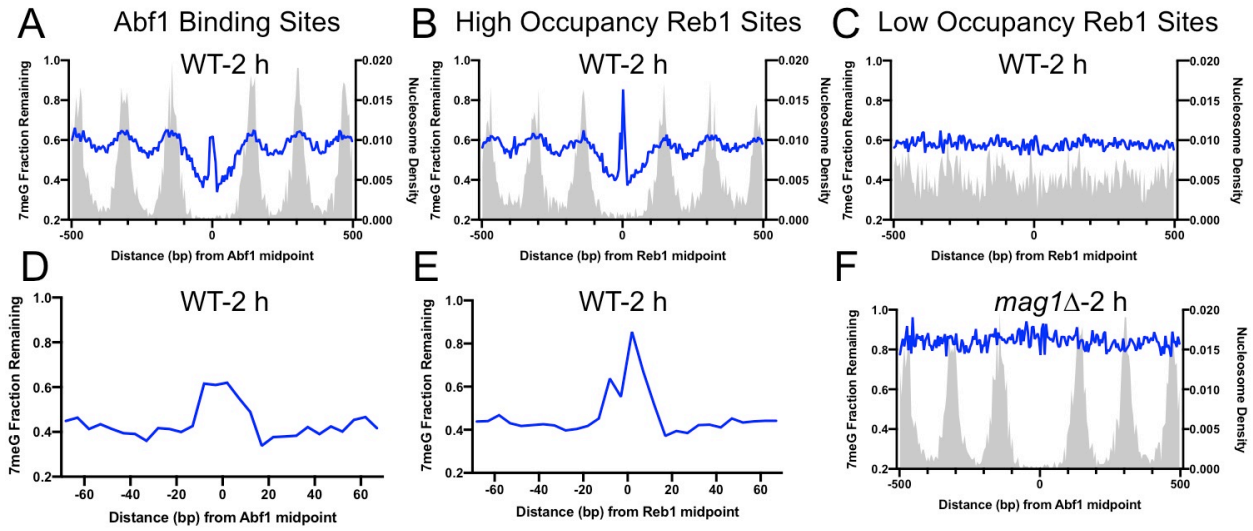

862  
863  
864  
865  
866  
867  
868  
869  
870  
871  
872  
873  
874  
875  
876  
877  
878  
879  
880  
881  
882  
883  
884  
885  
886  
887  
888  
889  
890

891 Figure 3

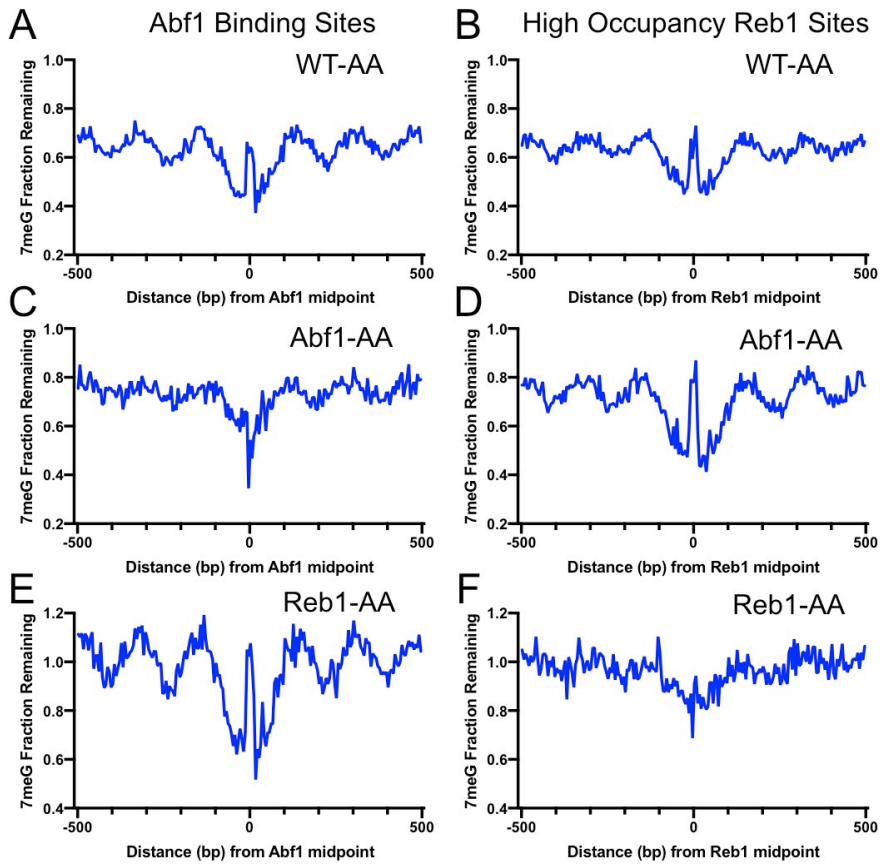

892  
893  
894  
895  
896  
897  
898  
899  
900  
901  
902  
903  
904  
905  
906  
907  
908  
909  
910  
911

912 Figure 4

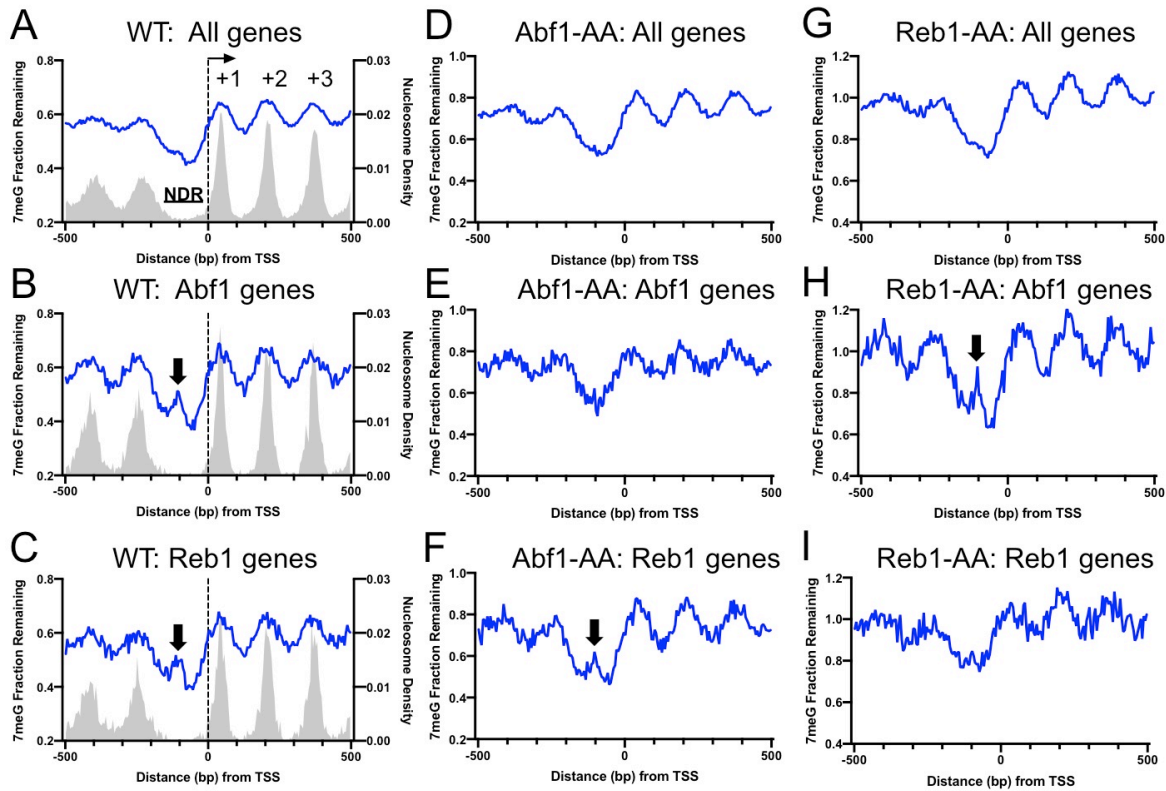

913  
914  
915  
916  
917  
918  
919  
920  
921  
922  
923  
924  
925  
926

927 Figure 5

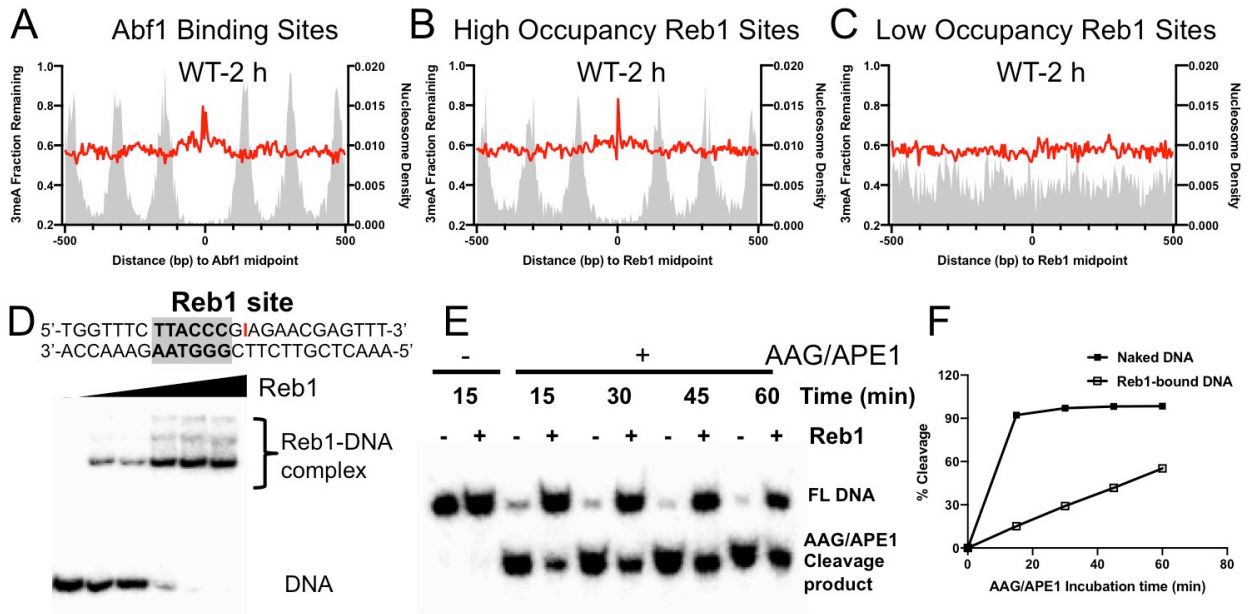

928  
 929  
 930  
 931  
 932  
 933  
 934  
 935  
 936  
 937  
 938  
 939  
 940  
 941  
 942  
 943  
 944  
 945  
 946  
 947  
 948  
 949  
 950  
 951  
 952  
 953  
 954  
 955

956 Figure 6  
957

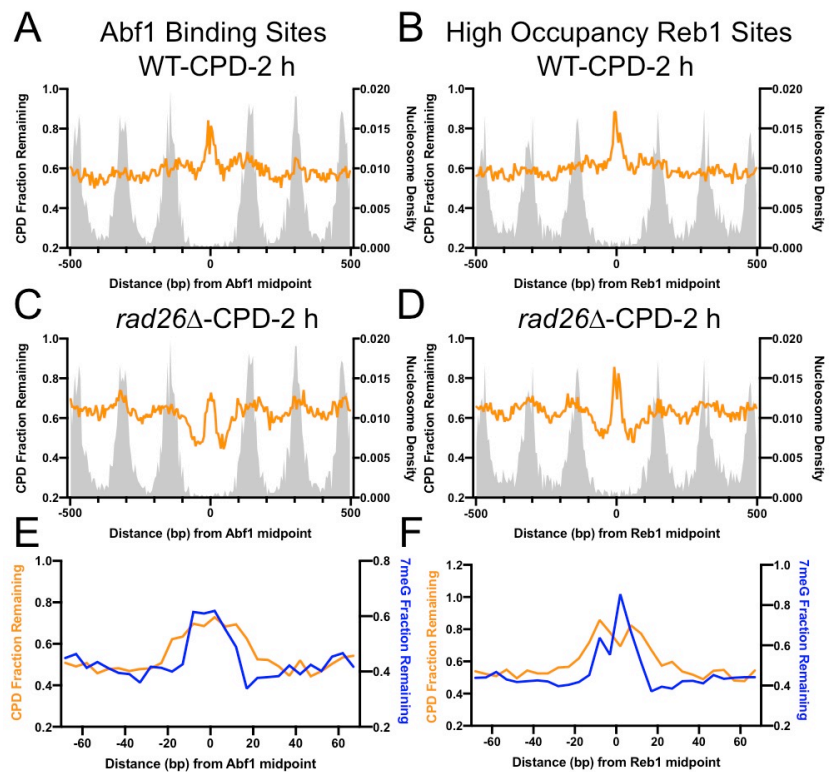

958  
959

960 **Supplemental Figures**

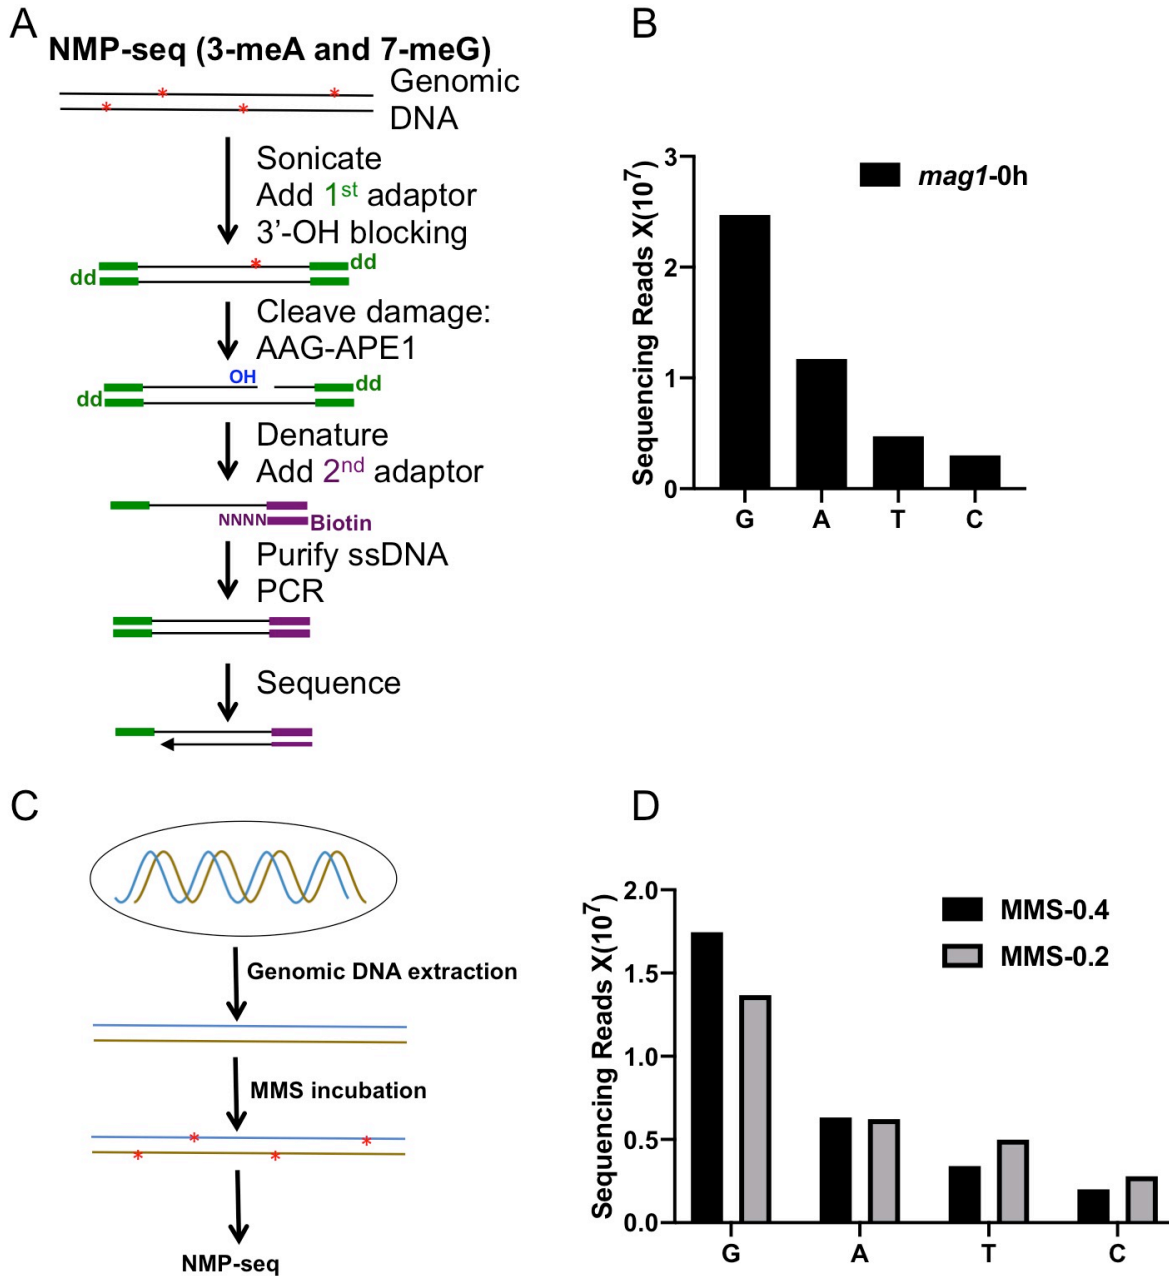

961

962 **Figure S1. NMP-seq methodology and damage mapping in naked yeast genomic**

963 **DNA. (A)** NMP-seq methodology. Genomic DNA was first sonicated to short fragments

964 (~400 bp) and ligated to the 1<sup>st</sup> adaptor (green). After blocking all free 3'-OH groups with

965 terminal transferase and dideoxy-ATP (dd), DNA fragments were digested with AAG



966 and APE1 to generate a new nick with a ligatable 3'-OH group at the NMP damage site.  
967 After denaturing to obtain single-stranded DNA, the new 3' end is ligated to a splint  
968 adaptor (2<sup>nd</sup> adaptor; purple) and the ligation occurs exactly at the damage site. The  
969 biotin on the 2<sup>nd</sup> adaptor allows purification of ligation product with the Streptavidin  
970 beads. The purified product is used as the template for PCR amplification, using primers  
971 complementary to the 1<sup>st</sup> and 2<sup>nd</sup> adaptors. The resulting library is sequenced on an Ion  
972 Torrent sequencer using a sequencing primer complementary to the 2<sup>nd</sup> adaptor. **(B)**  
973 NMP-seq read counts in MMS-treated *mag1* cells (0.4% MMS for 10 min). G and A  
974 reads are associated with 7meG and 3meA lesions in the genome. **(C)** Schematic for  
975 damage mapping in naked yeast genomic DNA. It differs from mapping cellular NMP  
976 lesions by inducing damage in purified DNA, instead of cellular DNA bound by proteins.  
977 **(D)** NMP-seq read counts for naked genomic DNA treated with 0.4% or 0.2% of MMS  
978 for 10 min.  
979

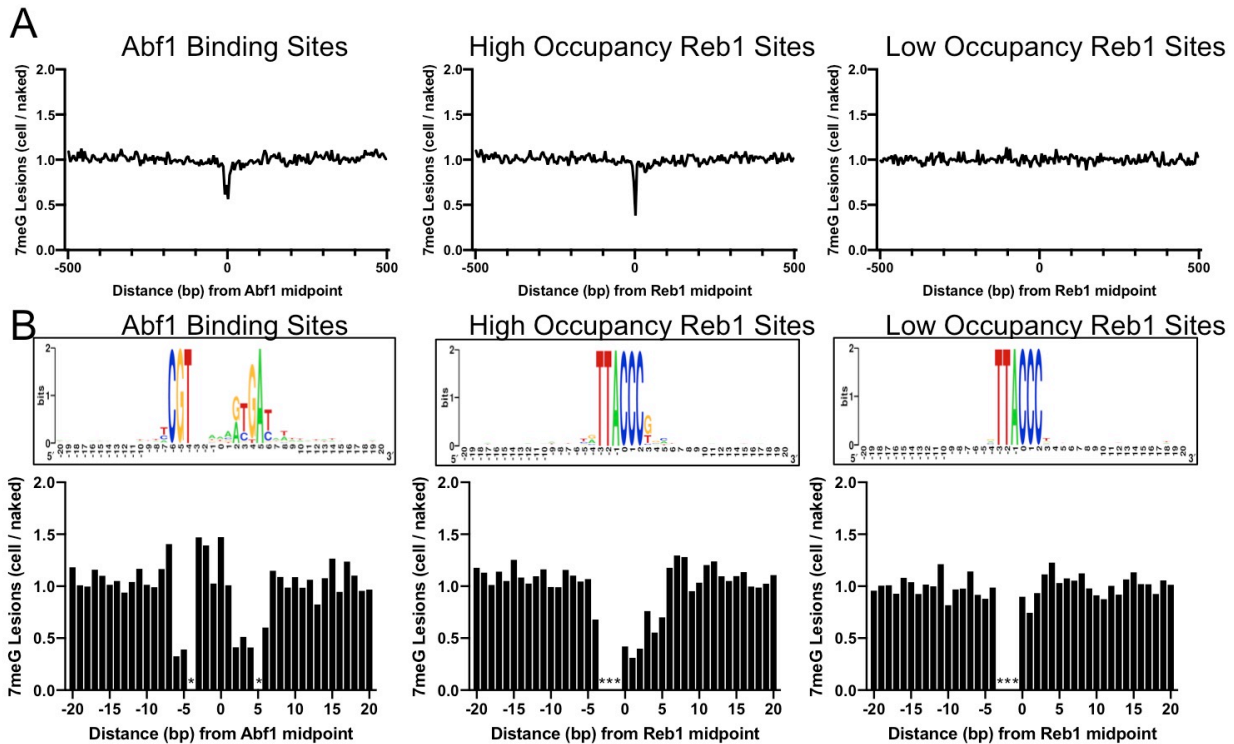

980

981 **Figure S2. Independent repeat of 7meG formation at Abf1 and Reb1 binding sites.**

982 **(A)** The average cellular 7meG damage level (normalized to naked DNA) in a 5-bp non-

983 overlapping moving window spanning 500 bp around the midpoint of Abf1, 'high-

984 occupancy' Reb1, and 'low-occupancy' Reb1 sites. **(B)** Normalized 7meG damage

985 levels at each individual position in the binding motif and its immediately adjacent DNA

986 for Abf1, 'high-occupancy' Reb1, and 'low-occupancy' Reb1 sites.

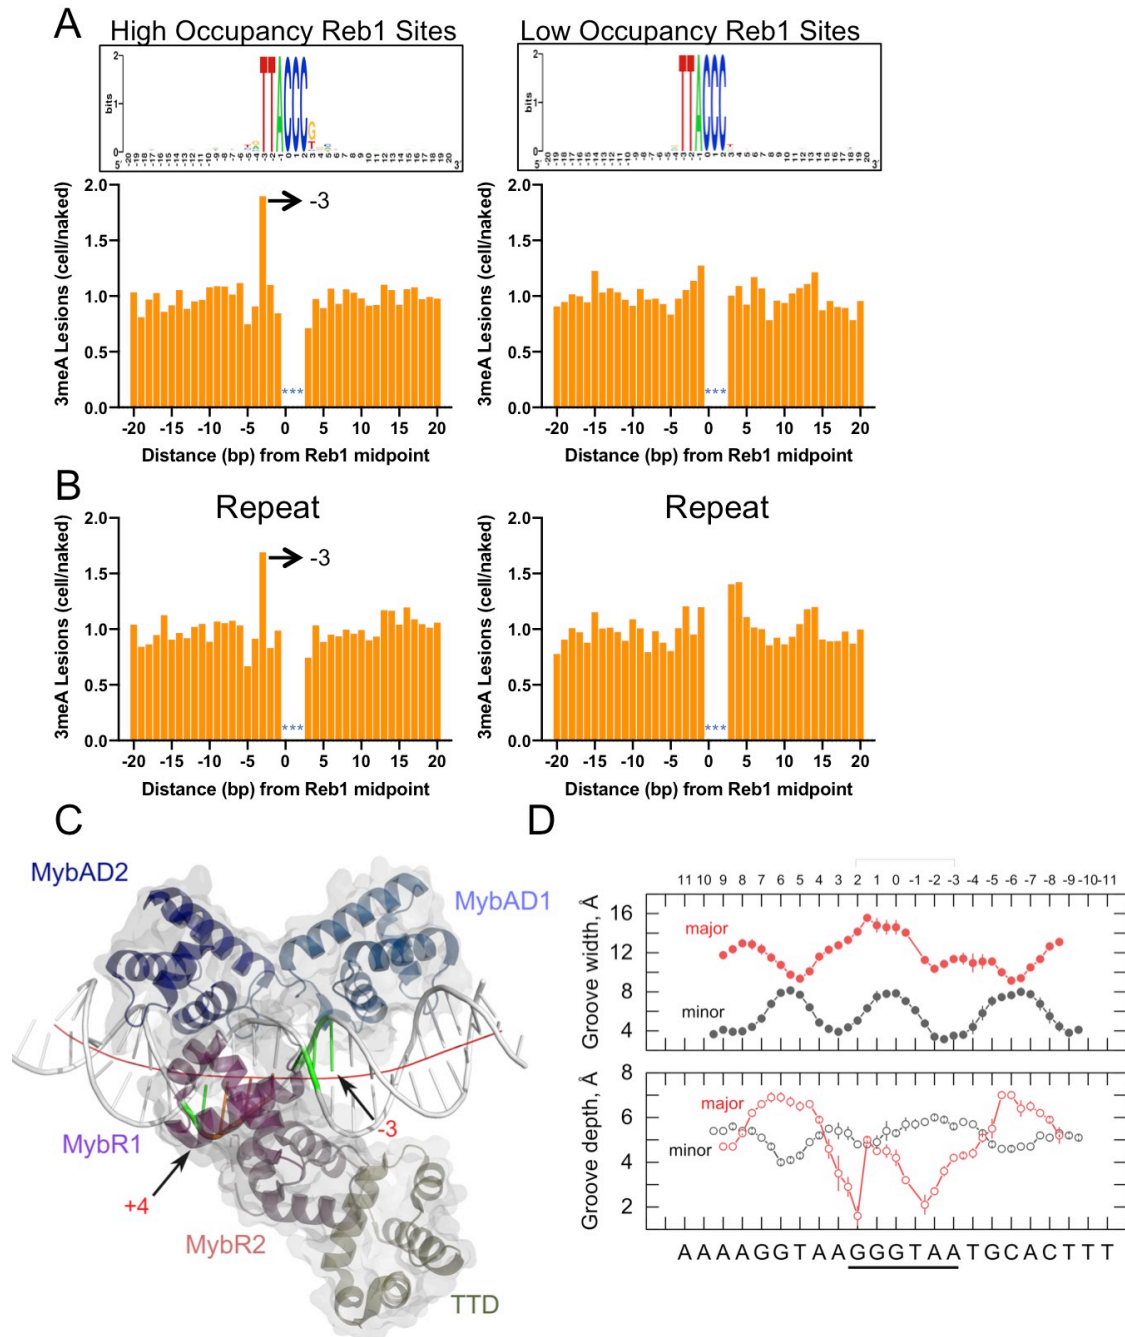

987

988 **Figure S3. A hotspot of 3meA damage in the Reb1 motif and position-dependent**  
 989 **distortion of Reb1-bound DNA of potential relevance to base methylation damage.**

990 **(A)** Left panel shows cellular 3meA reads (normalized to naked DNA) at ‘high-

991 occupancy’ Reb1 binding sites. Right panel indicates 3meA reads at ‘low-occupancy’

992 Reb1 binding sites. Data was generated in the *mag1* mutant cells. **(B)** An independent  
993 repeat of the NMP-seq experiment in *mag1* cells showing high 3meA formation at the -3  
994 position of Reb1 motif. Left and right panels show 3meA formation at ‘high-occupancy’  
995 and ‘low-occupancy’ Reb1 binding sites, respectively. **(C)** One of the *S. pombe*  
996 Reb1/DNA complexes in the co-crystal structure (PDB: 5eyb). The Reb1 DNA-binding  
997 domain (DBD) was colored by domain structure, with the C-terminal transcription  
998 termination domain (TTD) also shown. Positions -3 and +4 are highlighted. The fitted  
999 curvature in helical axis is shown in red. **(D)** Widths and depths of the major and minor  
1000 grooves along Reb1-bound DNA (consensus is 5'-GGGTAA-3'), reported as averages  $\pm$   
1001 SD for the two complexes in the asymmetric unit.

1002

1003

1004

1005

1006

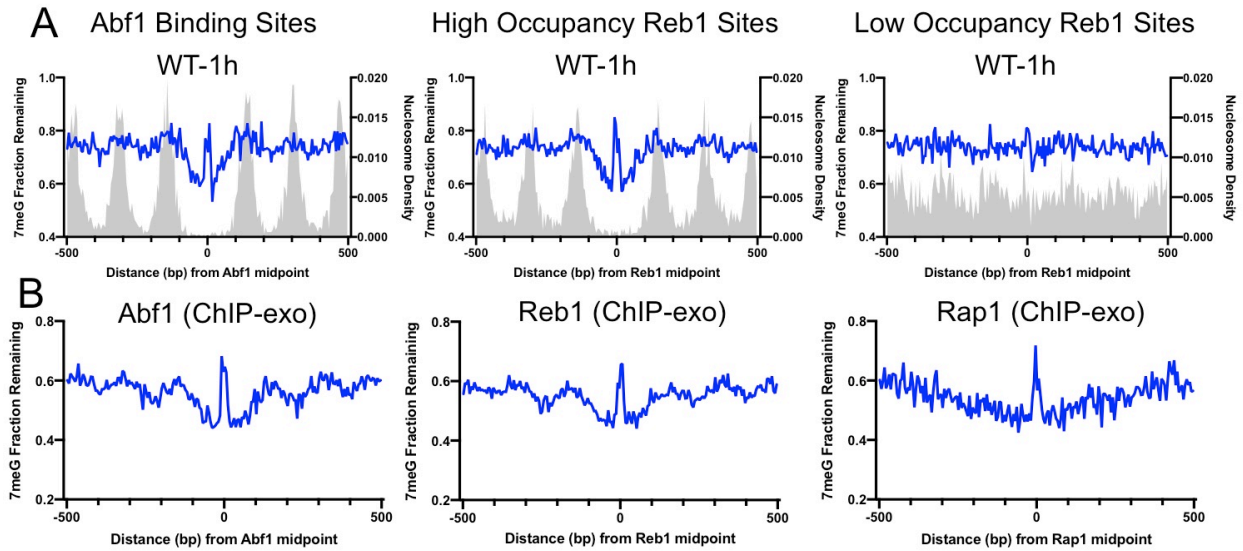

1007

1008

1009

1010

1011

1012

1013

**Figure S4. Inhibition of 7meG repair at TF binding sites mapped by ORGANIC and ChIP-exo. (A)** Fraction of remaining 7meG lesions at 1 h in WT cells. Repair was analyzed at Abf1 (left), ‘high-occupancy’ Reb1 (middle), and ‘low-occupancy’ Reb1 (right) sites generated by ORGANIC. **(B)** Fraction of remaining 7meG lesions at 2 h in WT cells at Abf1 (left), Reb1 (middle), and Rap1 (right) binding sites identified by ChIP-exo.

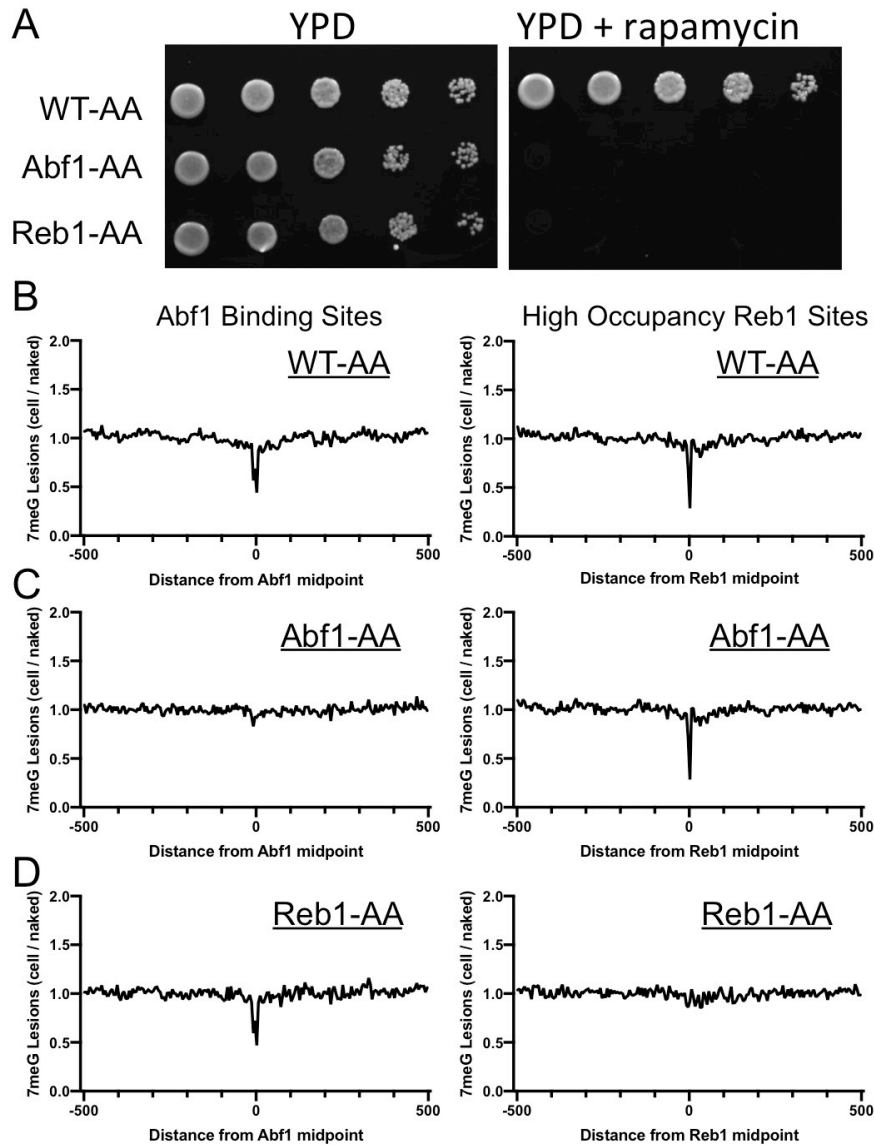

1014

1015 **Figure S5. Depletion of Abf1 or Reb1 restores 7meG damage formation at the**  
1016 **corresponding binding sites in yeast. (A)** Lethality caused by Abf1 or Reb1 depletion  
1017 on rapamycin-containing YPD plates. Yeast strains, WT-AA, Abf1-AA, and Reb1-AA,  
1018 were grown on regular YPD or YPD with 1  $\mu$ g/ml rapamycin. Pictures were taken after  
1019 growing at 30  $^{\circ}$ C for 72 h. **(B)** to **(D)** Distribution of 7meG lesions at Abf1 (left) and Reb1  
1020 (right) binding sites in WT-AA, Abf1-AA, and Reb1-AA cells. All the three strains were

1021 pre-treated with rapamycin for 1 h, followed by MMS treatment for 10 min. Damage was  
1022 mapped with NMP-seq.

1023

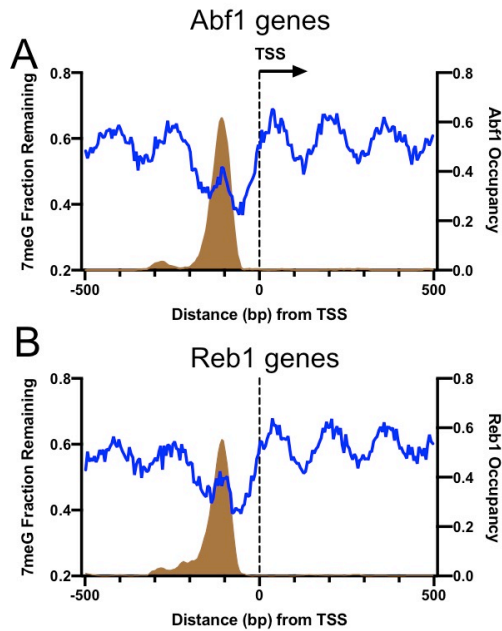

1024

1025 **Figure S6. Damage peaks overlap with Abf1 or Reb1 binding sites in gene**

1026 **promoters. (A)** Remaining 7meG and Abf1 occupancy in Abf1-linked genes. Blue line

1027 indicates 7meG damage and brown area depicts Abf1 occupancy. TSS stands for

1028 transcription start site. **(B)** Remaining 7meG and Reb1 occupancy in Reb1-linked

1029 genes. Genes were aligned at the TSS. Repair and TF occupancy were analyzed from

1030 500 bp upstream to 500 bp downstream relative to the TSS.

1031

1032



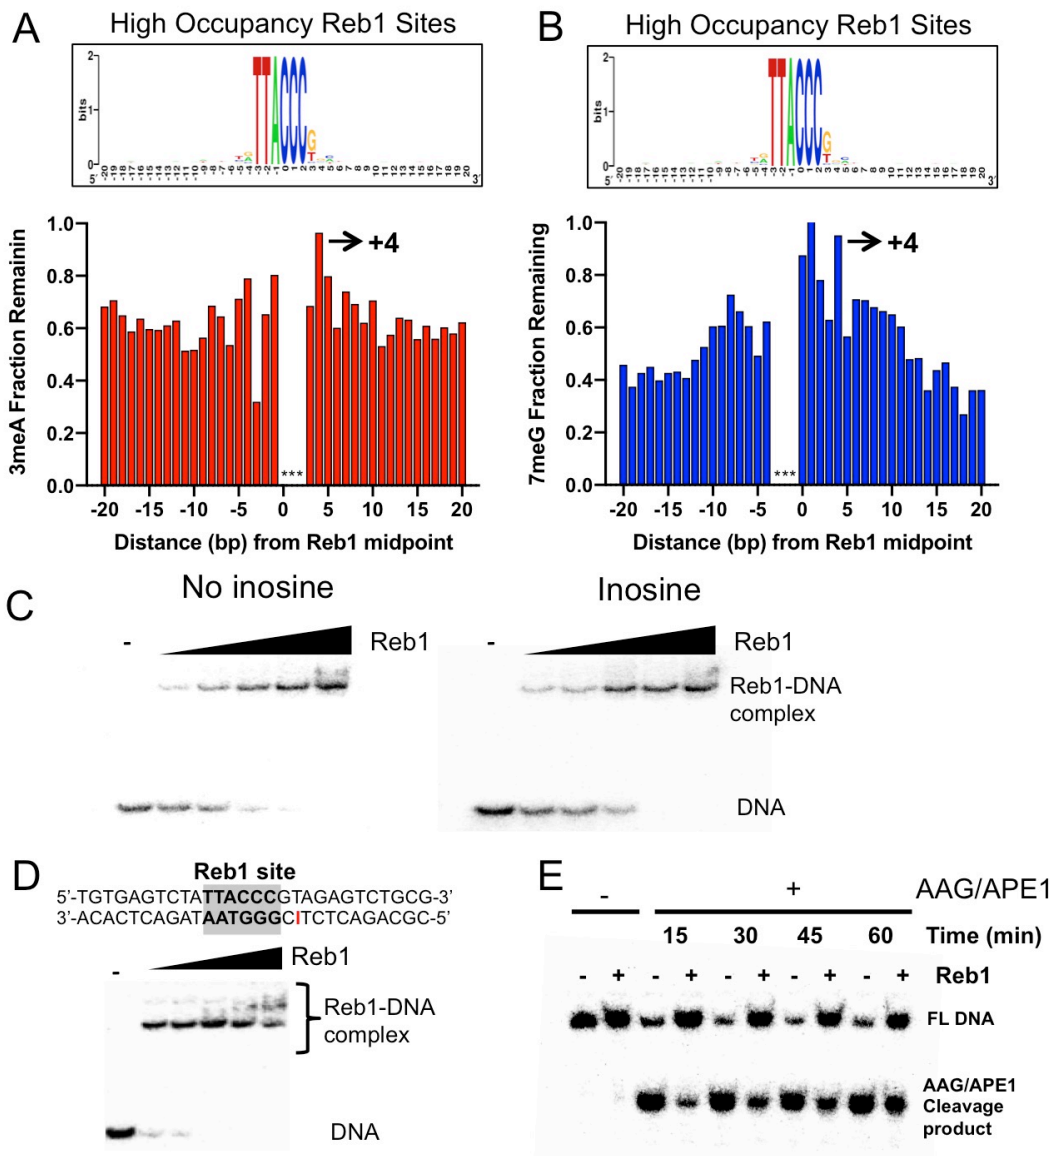

1033

1034 **Figure S7. Repair inhibition at the +4 position of Reb1 binding sites. (A)** Fraction of

1035 remaining 3meA damage at 'high-occupancy' Reb1 binding sites. Each bar indicates

1036 one nucleotide position in the binding motif and its adjacent DNA. The consensus motif

1037 sequence is shown on the top. **(B)** Fraction of remaining 7meG damage at 'high-

1038 occupancy' Reb1 binding sites. **(C)** Gel shift assays analyzing binding of synthesized

1039 double-stranded oligonucleotides with purified Reb1 protein. Left panel shows DNA

1040 without damage. Right panel shows DNA containing inosine at the +4 position. **(D)** The

1041 top panel shows DNA substrate with an inosine incorporated at the +4 position on the  
1042 non-motif strand. The lower panel shows binding between the DNA and Reb1 protein.  
1043 **(E)** Cleave of inosine-containing DNA (naked DNA) or DNA bound by Reb1 by  
1044 AAG/APE1. The damage was placed at the +4 position of the non-motif strand.  
1045
